1 **A Mesenchymal Cell Niche in Skin for Acute Myeloid Leukemia**

2 Running title: Extramedullary mesenchymal cell niche in AML

3 Lakshmi Sandhow<sup>1</sup>, Huan Cai<sup>1</sup>, Pingnan Xiao<sup>1</sup>, Elory Leonard<sup>1</sup>, Makoto Kondo<sup>1&</sup>, Xiaoyan  
4 Sun<sup>2</sup>, Anne-Sofie Johansson<sup>1</sup>, Karl Tryggvason<sup>3</sup>, Maria Kasper<sup>2</sup>, Marcus Järås<sup>4</sup>, Hong Qian<sup>1\*</sup>

5  
6 <sup>1</sup>Center for Hematology and Regenerative Medicine, Department of Medicine Huddinge,  
7 Karolinska Institute, Karolinska University Hospital, SE-141 86 Stockholm, Sweden;

8 <sup>2</sup>Department of Cell and Molecular Biology, Karolinska Institute, 171 77, Stockholm, Sweden;

9 <sup>3</sup>Department of Medical Biochemistry and Biophysics, Karolinska Institute, Stockholm, 17177,  
10 Sweden;

11 <sup>4</sup>Department of Clinical Genetics, Lund University, Lund 22184, Sweden.

12 <sup>&</sup>Current address: Cell Sheet Tissue Engineering Center (CSTEC), Department of  
13 Pharmaceutics and Pharmaceutical Chemistry, Health Sciences, University of Utah, 30 South  
14 2000 East, Salt Lake City, Utah 84112, USA.

15  
16 **\*Corresponding author:** Hong Qian, [hong.qian@ki.se](mailto:hong.qian@ki.se)

17  
18 Text word count: 3993 excluding acknowledgments

19 Abstract word count: 149

20 Figures: 7 main figures, 6 supplemental figures

21 References: 61

22

23 **Key points:**

- 24 • Leukemic cells infiltrated in skin are capable to generate AML post-transplantation
- 25 • Mesenchymal progenitors in skin contribute to forming the niche for AML cells
- 26 • Skin mesenchymal progenitors protect AML stem cells possibly by mitochondrial  
27 transfer
- 28 • *Lama4* deletion in skin mesenchymal niche promotes AML cell proliferation and  
29 chemoresistance to cytarabine

30

31 **Abstract (149)**

32 Leukemia cutis or leukemic cell infiltration in skin is one of the common extramedullary  
33 manifestations of acute myeloid leukemia (AML) and signifies a poorer prognosis. However,  
34 its pathogenesis and maintenance remain understudied. Here, we report massive AML cell  
35 infiltration in mouse skin. These cells were retained in the skin post-chemotherapy and could  
36 regenerate AML post-transplantation. The niche characterization revealed that skin harbored  
37 mesenchymal progenitor cells (MPCs) with a similar phenotype as BM mesenchymal stem  
38 cells. These skin MPCs maintained and protected AML-initiating stem cells (LSCs) from  
39 chemotherapy *in vitro* possibly via mitochondrial transfer. Furthermore, *Lama4* deletion in skin  
40 MPCs promoted AML LSC proliferation and chemoresistance. Importantly, more  
41 chemoresistant AML LSCs were retained in *Lama4*<sup>-/-</sup> mouse skin post-cytarabine treatment.  
42 Our study reveals the characteristics and previously unrecognized roles of skin mesenchymal  
43 niches in maintaining AML LSCs and protecting them during chemotherapy, meriting future  
44 exploration of their impact on AML relapse.

45

46 **Key words:** Early B-cell Factor 2, skin, mesenchymal progenitor cells, acute myeloid leukemia,  
47 hematopoietic stem cells, stem cell niche, leukemic stem cells, drug resistance, cytarabine,  
48 bone marrow

49

50 **Introduction**

51 Leukemia cutis (leukemic cell infiltration in skin) is one of the commonly observed  
52 extramedullary manifestations in acute myeloid leukemia (AML).<sup>1,2</sup> It is associated with poor  
53 survival in patients with AML.<sup>2-4</sup> However, our understanding of its pathogenesis is very  
54 limited. This has been mainly due to lack of knowledge about the extramedullary niches where  
55 AML cells infiltrate and are maintained.

56 For decades, great efforts have been put to elucidate the contribution of the hematopoietic  
57 niche in bone marrow (BM) to normal and malignant hematopoiesis. The BM niche consists  
58 of various types of cells including mesenchymal stem cells (MSCs), mesenchymal progenitors  
59 (MPCs), osteoblasts and endothelial cells. Accumulating evidence has shown that BM MSCs  
60 and MPCs play important roles in maintaining normal hematopoiesis and in the development  
61 of myeloid malignancies including AML.<sup>5,6</sup> Molecular alterations in these niches could lead to  
62 malignant transformation of hematopoietic cells.<sup>7-9</sup> During leukemia development, the  
63 leukemic cells can alter the BM niches, which renders the niche to become favorable for

64 leukemic cell growth but harmful for normal hematopoiesis.<sup>6,10-13</sup> Using a *Cre-LoxP* mouse  
65 model allowing for selective deletion of the MSC population, we have shown that loss of MSCs  
66 accelerates AML progression.<sup>6,10</sup> However, these markers are not unique for the mesenchymal  
67 cells in BM, thus, it is not clear whether the mesenchymal cell niches in extramedullary organs  
68 like skin are also affected, thereby contributing to the AML progression.

69 Besides BM, extramedullary organs such as adipose tissue have been reported to  
70 accommodate hematopoietic stem and progenitor cells (HSPCs) in the stromal vascular  
71 fraction.<sup>14</sup> In blast crisis of chronic myeloid leukemia, the gonadal white adipose tissue is  
72 infiltrated by leukemic cells that adapt to the extramedullary niche and transform into resistant  
73 leukemia-initiating stem cells (LSCs) marked by CD36 expression.<sup>15</sup> These findings indicate  
74 that extramedullary organs may serve as niches for HSPCs and LSCs.

75 Existing evidence suggests that skin might contain an MSC-like cell population.<sup>16-19</sup>  
76 However, their biological properties and contribution to hematopoiesis and leukemia remain  
77 unexplored. Knowledge of this would be essential for understanding the pathology of  
78 extramedullary leukemia in the skin, and would thus provide new insights into identifying new  
79 potential therapeutic targets that may be translated into new treatment strategies for AML  
80 patients with leukemia cutis.

81 We here in a transplantation-induced AML mouse model detected massive infiltration of  
82 AML cells in the skin. Importantly, these skin AML cells from mice at steady-state or post-  
83 chemotherapy could regenerate AML post-secondary transplantation. Characterization of the  
84 AML niche revealed the molecular features and developmental hierarchy of the skin MPCs.  
85 The MPCs expressing Early B-cell Factor 2 (*Ebf2*) contribute to mesenchymal cell turnover in  
86 the skin and were reduced post-AML onset. The skin MPCs could maintain and protect AML  
87 LSCs and loss of *Lama4* in skin MPCs promoted AML cell maintenance and resistance to  
88 chemotherapy. Altogether, our study revealed the characteristics and a previously  
89 unrecognized role of skin MPCs in maintaining AML LSCs during AML development and  
90 chemotherapy.

91

92

## 93 **Results**

### 94 **The AML cells infiltrated in skin can regenerate AML post-transplantation**

95 We have here studied extramedullary leukemia in skin by using an MLL-AF9<sup>+</sup> AML cell  
96 transplantation-induced AML mouse model (**Figure 1A**). Post-symptomatic AML onset, we  
97 detected the massive infiltration of the AML cells in the dorsal skin by fluorescence-activated

98 cell sorting (FACS) (**Figure 1B-1D**). The frequency was higher (41% of skin CD45<sup>+</sup> cells)  
99 than that in the blood, but lower than that in BM (>95%) (**Figure 1B-1C**). Confocal imaging  
100 showed that these AML cells mainly resided at perivascular sites in the skin (**Figure 1D**).

101 It is not known whether the AML cells infiltrated in skin contain LSCs capable to regenerate  
102 leukemia, particularly after chemotherapy. We therefore sorted the AML cells from the mouse  
103 skin post-cytarabine (Ara-C) or vehicle treatment and transplanted them into secondary  
104 recipients without prior irradiation (**Figure 1E-1K**). Notably, these AML cells even in a low  
105 dose (1000 cells/mouse) rapidly and efficiently generated AML in the recipients without pre-  
106 conditioning, as indicated by short survival (**Figure 1F**), low platelet counts (**Figure 1G**), high  
107 AML engraftment in the BM (**Figure 1H-1I**) and splenomegaly (**Figure 1J**). These results  
108 demonstrate the leukemia-initiating capacity of the AML cells residing in the skin tissue not  
109 only under steady-state but also after chemotherapy, indicating their potential impact in AML  
110 relapse.

111

### 112 **Skin harbors Ebf2<sup>+</sup> and Ebf2<sup>-</sup> MPC subsets with similar immunophenotype to BM MSCs**

113 To understand how the leukemic cells were maintained in the skin tissue, we explored the  
114 role of the extramedullary microenvironment in the skin using a similar approach as was used  
115 for characterizing the BM niche. BM MSCs have been shown to be involved in AML  
116 progression in mice<sup>6</sup>. They are defined by a phenotype of lacking expression of CD44,  
117 hematopoietic (CD45/TER119) and endothelial (CD31) cell markers, but positive for  
118 PDGFRa/CD140a, SCA1 and CD51.<sup>6,9,11,20,21</sup> The primitive MSCs in mouse BM can be  
119 identified by Ebf2 expression<sup>22</sup> and can generate MSCs that lack Ebf2.<sup>6</sup> However, the  
120 phenotype of native skin MSCs remains unknown. The question is whether the cells with  
121 similar features exist in skin and play a role in the AML cell maintenance under steady-state  
122 and following chemotherapy. To answer this, we first characterized mesenchymal stem and  
123 progenitors in the skin by using the *Ebf2-Egfp* reporter mice. Similar to BM, a fraction of  
124 CD45<sup>-</sup>TER119<sup>-</sup>CD31<sup>-</sup> skin stromal cells expressed Ebf2 (**Figure 2A**). The Ebf2<sup>+</sup> cells  
125 accounted for about 2% and 5% of total live cells and CD45<sup>-</sup>TER119<sup>-</sup>CD31<sup>-</sup> stromal cells,  
126 respectively (**Figure 2B-2C**). Phenotypically, skin Ebf2<sup>+</sup> cells highly expressed  
127 PDGFRa/CD140a and SCA1 (PαS) whereas about 41% of the Ebf2<sup>-</sup> cells were PαS cells  
128 (**Figure 2D**).

129 Functionally, both the Ebf2<sup>+</sup> and Ebf2<sup>-</sup> cells contained CFU-Fs, a colony-forming unit  
130 characteristic for MSCs (**Figure 2E, Figure S1A**). The CFU-Fs in the Ebf2<sup>+</sup> cells were

131 generated exclusively by the SCA1<sup>+</sup> population (**Figure 2F**). Both Ebf2<sup>+</sup> and Ebf2<sup>-</sup>PαS cell  
132 populations showed similar proliferation kinetics after passage 5-6 (**Figure S1B**) and were able  
133 to differentiate towards osteogenic and adipogenic lineages *in vitro* (**Figure S1C**). However,  
134 they failed to differentiate into chondrocytes in either monolayer or micromass pellet culture  
135 in which condition BM MSCs could differentiate into chondrocytes (**Figure S1C-S1D**). These  
136 data indicate that the Ebf2<sup>+</sup> and Ebf2<sup>-</sup>PαS cells in mouse skin may represent bipotential MPCs  
137 although they have the same immunophenotype as BM MSCs.

138

### 139 **Single-cell assay confirms osteo-adipo bipotentials of skin Ebf2<sup>+</sup> and Ebf2<sup>-</sup>PαS cells**

140 To validate the identity of the skin stromal subsets, we characterized these cells at single  
141 cell level. Limiting dilution experiment revealed that the CFU-F frequency in both skin Ebf2<sup>+</sup>  
142 and Ebf2<sup>-</sup>PαS fractions was as high as 1 in 4 (**Figure 2G, 2I**). Of 8 randomly selected CFU-  
143 Fs from single Ebf2<sup>+</sup> cells, 7 (88%) showed both osteogenic and adipogenic differentiation  
144 potency although to different degrees (**Figure 2H, 2K**). However, only 43% (3 clones of 7) of  
145 the Ebf2<sup>-</sup>PαS cells showed bi-lineage potency toward osteoblasts and adipocytes (**Figure 2J-  
146 2K**). The chondrogenic potency, however, was not evaluated at single cell level since none of  
147 these cell subsets differentiated into chondrocytes at the bulk level. The self-renewal capacity  
148 of the Ebf2<sup>+</sup> and Ebf2<sup>-</sup> cells was evaluated by serially replating of single CFU-F derived from  
149 the single sorted cells. Three out of 5 clones from 12 CFU-Fs initially generated by single  
150 Ebf2<sup>+</sup> cells could be serially replated for beyond 10 passages while the other 2 clones were  
151 able to expand to passage 5 (**Figure 2L**). Meanwhile, only 1 in 3 CFU-F clones derived from  
152 9 Ebf2<sup>-</sup>PαS cells-derived CFU-Fs could be serially replated for over 8 passages (**Figure 2L**),  
153 indicating a limited self-renewal capacity of the Ebf2<sup>-</sup>PαS cells. These data further support the  
154 notion that the skin Ebf2<sup>+</sup> and Ebf2<sup>-</sup>PαS cells are enriched with osteo-adipogenic MPCs.

155

### 156 **Skin Ebf2<sup>+</sup> cells are mainly located at perivascular sites**

157 Similar to that in mouse BM, the skin Ebf2<sup>+</sup> cells did not express endothelial cell marker CD31  
158 (**Figure S2A**). However, the Ebf2<sup>+</sup> cells highly expressed PDGFRb/CD140b, a marker  
159 expressed in pericytes<sup>23</sup> and niche-forming perivascular cells in BM<sup>24</sup> (**Figure S2B**), pointing  
160 to a pericyte phenotype. Confocal imaging illustrated that the majority of the Ebf2<sup>+</sup> cells were  
161 adjacent to the endothelial cells in the skin (**Figure 3A-3B, Figure S2C**). Some scattered Ebf2<sup>+</sup>  
162 cells were also found in dermal panniculus carnosus, a layer of striated muscle (**Figure 3A**).  
163 Approximately 55% and 41% of the Ebf2<sup>+</sup> cells were positive for the pericyte marker NG2,

164 respectively (**Figure S2D, S2F**), and 81% of them expressed  $\alpha$ -smooth muscle actin (SMA)  
165 (**Figure S2E-S2F**), reported to mark pericytes in BM<sup>25</sup>. Altogether, these data suggest a  
166 perivascular origin and heterogeneity of the skin Ebf2<sup>+</sup> cells.

167

### 168 **The Ebf2<sup>+</sup> cells in skin contribute to the mesenchymal cell turnover**

169 To understand how mesenchymal cell niche in the skin is maintained, we determined the  
170 physiological contribution of the Ebf2<sup>+</sup> stromal cells to the niche formation by lineage-tracing  
171 using *TgEbf2-Egfp xCre<sup>ERT2</sup> X Rosa26-tomato* mice (**Figure 3C**). This mouse model allowed  
172 us to track the fates of the Ebf2<sup>+</sup> cells *in vivo* since the Ebf2<sup>+</sup> cells express GFP and their  
173 progeny is marked by Tomato after tamoxifen (TAM) injection. About 15% of total Ebf2<sup>+</sup> cells  
174 were Tomato<sup>+</sup>(Ebf2<sup>+</sup>Tomato<sup>+</sup>) cells at 3 months after TAM induction (**Figure S3A-S3B**). The  
175 Ebf2<sup>+</sup>Tomato<sup>+</sup> cells could generate Ebf2<sup>-</sup>P $\alpha$ S MPCs and more mature CD45<sup>-</sup>TER119<sup>-</sup>CD31<sup>-</sup>  
176 CD44<sup>-</sup>CD140a<sup>+</sup>SCA1<sup>-</sup> stromal cells (**Figure 3D-3E**), indicating the important role of the Ebf2<sup>+</sup>  
177 cells in maintaining the mesenchymal cell compartment in the skin.

178 The fraction of the Ebf2<sup>+</sup>Tomato<sup>+</sup> cells within stromal cells remained constant up to 12  
179 months post TAM induction (**Figure 3E**), which is likely attributed to their self-renewal ability.  
180 However, the Ebf2<sup>-</sup>Tomato<sup>+</sup> cells which were produced by the Ebf2<sup>+</sup>Tomato<sup>+</sup> cells increased  
181 from 11% at 3 months to 21% at 6 months post-TAM injection, then remained stable at 12  
182 months (**Figure 3E**). Within the newly generated Ebf2<sup>-</sup>Tomato<sup>+</sup> cells, the majority were P $\alpha$ S  
183 MPCs and about 5% were the CD140a<sup>+</sup>SCA1<sup>-</sup> cells (**Figure 3F**). Within the total P $\alpha$ S MPCs,  
184 only about 0.5% were Ebf2<sup>+</sup>Tomato<sup>+</sup> cells and 30% were the newly generated Ebf2<sup>-</sup>Tomato<sup>+</sup>)  
185 P $\alpha$ S cells at 6 months post-TAM (**Figure S3C-S3E**). These data suggest a substantial  
186 contribution of the Ebf2<sup>+</sup> MPCs to generating the Ebf2<sup>-</sup>Tomato<sup>+</sup>P $\alpha$ S MPCs while maintaining  
187 the Ebf2<sup>+</sup> cell pool. The actual contribution might have been underestimated due to the  
188 incomplete *Cre* activation in the Ebf2<sup>+</sup> cells, reflected in the presence of Ebf2<sup>+</sup>Tomato<sup>-</sup> cells  
189 shortly (2-3days) after TAM injection (data now shown).

190 Similar to the Ebf2<sup>+</sup> cells, the Ebf2<sup>-</sup>Tomato<sup>+</sup> cells were mainly distributed in the lower  
191 dermis and adjacent to CD31<sup>+</sup> endothelial cells (**Figure 3G**). Unlike the Ebf2<sup>+</sup> cells, the Ebf2<sup>-</sup>  
192 Tomato<sup>+</sup> cells lacked NG2 expression (**Figure S3F**). Only 19% and 28% of the Ebf2<sup>-</sup>Tomato<sup>+</sup>  
193 cells expressed NESTIN and  $\alpha$ -SMA, respectively (**Figure S3G-SI**),

194 Altogether, skin harbors Ebf2<sup>+</sup> and Ebf2<sup>-</sup>P $\alpha$ S MPCs with a similar phenotype as BM MSCs.  
195 The Ebf2<sup>+</sup> MPCs reside at the top of the developmental hierarchy and contribute to  
196 mesenchymal cell generation in the skin.

197

198 **Skin MPCs play a role in maintaining normal hematopoietic and AML cells *in vitro***

199 Identification of the skin MPC populations made it possible to analyze their potential role  
200 in the maintenance of AML cells. We first evaluated the function of skin MPC subsets in  
201 supporting normal hematopoietic stem cells (HSCs) in a co-culture system and compared to  
202 BM MSCs (**Figure S4A**). Similar to their BM counterparts, both skin Ebf2<sup>+</sup> and Ebf2<sup>-</sup>PαS  
203 MPCs were able to maintain HSC activities, indicated by similar numbers of CFU-Cs generated  
204 from the SCA1<sup>+</sup>KIT<sup>+</sup>(LSK)CD150<sup>+</sup> cells after the co-coculture with skin MPCs or BM MSCs  
205 (**Figure S4B-S4C**). This finding was further supported by the similar cobblestone area forming  
206 cells (CAFCs) generated from the BM LSK cells co-cultured with the skin MPCs or BM MSCs  
207 (**Figure S4D-S4E**). The BM Ebf2<sup>-</sup>PαS cells displayed better capacity in supporting CAFC  
208 formation from the LSK cells than the BM Ebf2<sup>+</sup> MSCs (**Figure S4F**). Altogether, these data  
209 indicated that skin MPCs possessed similar hematopoiesis supportive function as BM MSCs.

210 To assess the role of skin MPCs in supporting AML LSC growth, we next performed CAFC  
211 assay of MLL-AF9<sup>+</sup> AML cells (**Figure 4A**). Like BM Ebf2<sup>+</sup> MSCs, skin MPC subsets could  
212 support CAFC formation from the AML cells, but to a lesser degree than the BM Ebf2<sup>-</sup>PαS  
213 cells (**Figure 4B-4C**).

214 Increasing evidence suggests that BM stromal cells may protect leukemia cells from  
215 cytostatic drugs.<sup>26-30</sup> However, it is not known if extramedullary stromal cells have similar  
216 functions. We then tested the chemoprotective function of skin MPCs by CAFC assay. We  
217 administered Ara-C 2 days after seeding the MLL-AF9<sup>+</sup> AML cells to the MPCs to allow for  
218 efficient cell-cell interactions (**Figure 4A**). Both skin Ebf2<sup>+</sup> and Ebf2<sup>-</sup>PαS cells could protect  
219 the AML LSCs from Ara-C treatment, demonstrated by the persistence of residual CAFCs after  
220 Ara-C treatment, in striking contrast to the efficient killing of the AML cells cultured alone  
221 (**Figure 4D-4E**). No difference in the frequency of KIT<sup>+</sup> AML cells, representing AML  
222 LSCs,<sup>31</sup> was observed among all the co-cultures (**Figure 4F**). However, the numbers of the  
223 residual KIT<sup>+</sup> LSCs were significantly increased in the co-cultures with the stromal cells  
224 compared to the monoculture post-Ara-C treatment (**Figure 4G**). CD36 was reported to be a  
225 marker for chemoresistant leukemic cells.<sup>15,32,33</sup> Post-Ara-C, the CD36<sup>+</sup> AML cells were  
226 selectively enriched in all the co-cultures except that with skin Ebf2<sup>-</sup>PαS MPCs (**Figure 4H**),  
227 however, only in the culture with skin MPC subsets, significant more CD36<sup>+</sup> AML cells were  
228 retained (**Figure 4I**). These data indicate a previously unrecognized role of skin MPCs in AML  
229 LSC maintenance and protection.

230

231 **The altered mesenchymal niches in the skin during AML development.**

232 Niche-remodeling in BM has been considered as one of the mechanisms contributing to  
233 leukemia progression<sup>6,34-36</sup>. By confocal imaging, we observed the perivascular location of the  
234 AML cells (**Figure 1D**) and the localization adjacent to the skin Ebf2/GFP<sup>+</sup> MPCs in the skin  
235 (**Figure 4J**). We then evaluated whether the skin cellular niches were remodeled by the AML  
236 cells as observed in their BM counterparts.<sup>6</sup> The proportion of Ebf2<sup>+</sup> MPCs in the skin stromal  
237 cells were reduced post-symptomatic onset of AML (**Figure 4K-4L**) whereas the Ebf2-P $\alpha$ S  
238 cells remained unchanged (**Figure 4M-4N**). This finding is consistent with the reduced P $\alpha$ S  
239 cell fraction in the Ebf2<sup>+</sup> cells in AML mouse BM and might contribute to further AML cell  
240 proliferation since deletion of Ebf2<sup>+</sup> cells in mice led to AML acceleration.<sup>6</sup> In addition, while  
241 the total CD31<sup>+</sup> endothelial cells were unaltered, however, as observed in BM,<sup>6</sup> the  
242 CD31<sup>+</sup>SCA1<sup>+</sup> arteriolar endothelial cells were significantly increased (**Figure 4O-4P**),  
243 indicating an increase of arterioles in dorsal skin during AML development.

244

245 **Molecular evidence for the role of skin MPCs in hematopoiesis and AML**

246 To investigate the molecular mechanisms behind the hematopoiesis-supportive function of  
247 the skin MPCs, we performed RNA sequencing on the freshly sorted skin Ebf2<sup>+</sup> and Ebf2-P $\alpha$ S  
248 MPCs. This revealed a distinct transcriptional profile of skin MPCs and BM MSCs with 1150  
249 and 816 genes differentially expressed between skin Ebf2<sup>+</sup> and Ebf2-P $\alpha$ S MPCs compared to  
250 BM MSCs, respectively (**Figure 5A**). However, only 135 genes were differentially expressed  
251 between the skin Ebf2<sup>+</sup> and Ebf2-P $\alpha$ S cells. Among them, the genes associated with TNF $\alpha$   
252 signaling, angiogenesis and epithelial to mesenchymal transition, such as *Lama5* and *Tnc*, were  
253 upregulated while the cell proliferation genes were downregulated in the more primitive Ebf2<sup>+</sup>  
254 cells (**Figure 5B, Figure S5A**). We then compared skin MPC pool (Ebf2<sup>+</sup> and Ebf2-P $\alpha$ S) with  
255 BM MSCs. The genes related to skin tissue maintenance (*Krt14*, *Krt19*) and adipogenesis  
256 (*Fabp4*) were upregulated in the skin MPCs (**Figure 5C**), showing tissue origin-related  
257 characteristics of these cells. Consistent with the limited chondrogenic differentiation capacity  
258 of skin MPCs (**Figure S1C-S1D**), the genes associated with osteogenesis and chondrogenesis  
259 were downregulated in the cells (**Figure S5B**). Conversely, skin MPCs were enriched with  
260 genes related to fatty acid metabolism and oxidative phosphorylation indicating a distinct  
261 metabolic profile between the skin and BM MSCs (**Figure 5D-5E**). Furthermore, the genes



262 related to inflammatory response were enriched in the skin MPCs relative to BM MSCs  
263 (**Figure 5E-5F, Figure S5C**), indicating a possible pro-inflammatory phenotype of skin MPCs.

264

265 Notably, no overall significant difference in the hematopoiesis supportive gene expression  
266 between the skin MPCs and BM MSCs (**Figure 5G**). The findings were confirmed by Q-PCR  
267 of the genes in these freshly sorted cells (**Figure 5H**). Similar to BM MSCs, both skin MPC  
268 subsets expressed *Cxcl12*, *Kitl (Scf)*, *Jag1*, *Lama4* and *Angptl1*, all of which are known to be  
269 critical for hematopoiesis maintenance and regeneration.<sup>37-44</sup> The expressions of *Kitl*, *Jag1* and  
270 *Lama4* were even significantly higher in skin Ebf2<sup>+</sup> and Ebf2<sup>-</sup>PαS cells than that in BM MSCs.  
271 Moreover, the expression of *Spp1*, a negative regulator of HSC expansion,<sup>45</sup> was lower in skin  
272 MPCs than that in BM MSCs (**Figure 5C, 5H**). This finding support the similar function of  
273 skin MPCs and BM MSCs for HSCs and AML LSCs.

274

### 275 **Enhanced mitochondrial transfer from skin MPCs to AML cells contributed to the** 276 **chemoprotection of AML cells**

277 To reveal the mechanisms underlying the function of skin MPCs in maintaining and  
278 protecting AML LSCs, we examined the metabolic support from skin MPCs to AML cells in  
279 coculture since the genes related to oxidative phosphorylation and fatty acid metabolism are  
280 enriched in the skin MPCs. Mitochondria transfer has been reported as one of the protective  
281 mechanisms during chemotherapy in leukemias to provide energy support and anti-oxidant  
282 machinery leading to modulating oxidative stress induced by chemotherapy<sup>35,46-48</sup>. In a co-  
283 culture with mitochondria-prelabeled skin MPCs (**Figure 6A**), we detected enhanced  
284 mitochondrial transfer from skin MPCs to the AML cells compared to BM MSCs (**Figure 6B-**  
285 **6C**). Correspondingly, the AML cells cocultured with skin MPCs showed lower ROS levels  
286 and higher viability during Ara-C treatment (**Figure 6D-6E**). These data indicated that skin  
287 MPCs could maintain AML LSCs and protect them from Ara-C treatment *in vitro* possibly by  
288 reducing oxidative stress. Thus, skin MPCs could be an important element in creating an  
289 extramedullary sanctuary for AML LSCs.

### 290 ***Lama4* loss in skin MPCs enhanced AML LSC proliferation and chemoprotection *in vitro***

291 *Lama4* was highly expressed in skin MPCs (**Figure 5H**) and we have found that *Lama4* loss  
292 in mice promoted AML LSC proliferation, chemoresistance, and relapse.<sup>35</sup> This has tempted  
293 us to test the impact of *Lama4* deletion in skin MPCs on AML LSC growth (**Figure 6F**). We  
294 observed increased AML cell proliferation and chemoresistance to Ara-C at 24h post-the co-

295 culture *Lama4*<sup>-/-</sup> skin MPCs (**Figure 6G**). Further CAFC assay indicated that *Lama4*<sup>-/-</sup> skin  
296 MPCs promoted AML LSC proliferation and chemoresistance to Ara-C (**Figure 6H**),  
297 suggesting a suppressive impact of *Lama4* expression in skin MPCs on AML cell growth and  
298 chemoresistance.

299

### 300 **The increased chemoresistant AML cells in *Lama4*<sup>-/-</sup> mouse skin post-Ara-C treatment**

301 To further explore the molecular mechanism involving in the role of the extramedullary niche  
302 in the skin for maintaining residual AML cells after chemotherapy, we here took advantage of  
303 *Lama4*<sup>-/-</sup> mice (**Figure 7A**) where AML progression and relapse are accelerated.<sup>35</sup> There was  
304 no homing preference of the AML cells to *Lama4*<sup>-/-</sup> skin and BM (**Figure S6**). One day post-  
305 Ara-C treatment, confocal imaging illustrated more residual AML cells retained in *Lama4*<sup>-/-</sup>  
306 mouse skin, compared to that in *Lama4*<sup>+/+</sup> mice following Ara-C treatment (**Figure 7B**).  
307 However, such a difference was not detected by FACS analysis while the elimination of the  
308 AML cells from the PB and skin were clearly observed (**Figure 7C**). It is possible that some  
309 of the remaining AML cells were lost during enzymatic digestion of the skin for FACS whereas  
310 confocal imaging was performed on the tissue fixed directly after dissecting. It is important to  
311 note that the chemoresistant CD36<sup>+</sup> AML cells<sup>15,33</sup>, not KIT<sup>+</sup> cells were enriched in *Lama4*<sup>-/-</sup>  
312 mouse skin post-Ara-C treatment (**Figure 7D**), which was not observed in the BM, as  
313 reported.<sup>35</sup> These data suggest that *Lama4* expression in skin mesenchymal niche play a role in  
314 maintaining the chemosensitivity of AML cells in the skin to Ara-C.

315

### 316 **Discussion**

317 We here report that skin tissue harbored two distinct MPC subsets, the Ebf2<sup>+</sup> and Ebf2<sup>+</sup>PαS  
318 cells, sharing a similar phenotype with BM MSCs.<sup>20,49,50</sup> During AML development, similar to  
319 leukemia cutis observed in patients, a substantial amount of AML cells infiltrated in mouse  
320 skin. The AML cells were distributed along vascular sites and co-localized with the skin Ebf2<sup>+</sup>  
321 cells. Importantly, these AML cells isolated from mice at steady-state and after chemotherapy  
322 could initiate AML post-transplantation into immunocompetent mice. Molecular  
323 characterization of the skin MPCs showed high expression of *Lama4*, *Kitl* and *Jag1*, known  
324 to be important for normal hematopoiesis maintenance and leukemic cell proliferation.<sup>31,35,37-  
325 44,51</sup> The skin mesenchymal cell niche maintained AML LSCs and protected them from  
326 chemotherapeutic agent Ara-C. Furthermore, *Lama4* loss in skin MPCs promoted AML  
327 proliferation and chemoresistance. Our study provides evidence for the characteristics and

328 previously unrecognized role of skin mesenchymal cell niche during AML development and  
329 after chemotherapy.

330

331 Leukemia cutis is commonly observed in monocytic AML (FAB, M5) and pediatric patients  
332 with congenital leukemia are prone to develop leukemia cutis, ranging from 25% to 30% of  
333 the cases.<sup>52</sup> It also correlates with manifestations of other extramedullary sites and is associated  
334 with a poor prognosis in patients.<sup>1-3</sup> However, leukemia cutis has been understudied. Its impact  
335 on AML relapse remains unexplored. We here show AML-regenerating capacity of the residual  
336 AML cells in skin post-chemotherapy, pointing to a possible involvement of these leukemic  
337 cells in the relapse of AML. In patients, leukemia cutis is usually present concurrently with  
338 AML cell infiltration in BM. However, in some cases, it may precede systemic involvement,<sup>4</sup>  
339 and it is unclear whether the leukemic cells infiltrated in the skin originate from BM.

340

341 We here for the first time show the chemoprotective role of skin MPCs for AML LSCs.  
342 Multiple mechanisms might be involved in the protection. Mitochondrial transfer from stromal  
343 cells to leukemic cells has been reported to be one of the mechanisms to protect leukemic cells  
344 to survive from chemotherapy by providing antioxidant system to counteract the therapy  
345 induced oxidative stress.<sup>53</sup> We here detected a mitochondrial transfer from skin MPCs to the  
346 AML cells during chemotherapy *in vitro*, even in a greater degree, than that from BM MSCs.  
347 This finding is in line with the enrichment of oxidative phosphorylation genes in skin MPCs.  
348 In addition, *Lama4* expression in skin MPCs seemed to maintain AML LSC chemosensitivity  
349 since *Lama4* loss in skin MPCs led to enhanced proliferation and chemoprotection of AML  
350 LSCs. In line with this, the residual chemoresistant CD36<sup>+</sup> AML cells in *Lama4*<sup>-/-</sup> skin were  
351 increased post-Ara-C treatment. Such an effect was not observed in the BM. One possible  
352 reason could be the differential expression of *Kitl*, *Jag1* and *Lama4*, known to be important for  
353 AML development.<sup>31,35,54</sup> Furthermore, the upregulated inflammatory genes in skin MPCs  
354 might have contributed to this effect.

355 Our findings of the identity and immunophenotype of skin MPCs will facilitate the  
356 prospective isolation of the cells for further characterization *ex vivo*. The skin Ebf2<sup>+</sup> MPCs co-  
357 express pericyte markers like CD140b/PDGFRb, NG2 and  $\alpha$ -SMA and their perivascular  
358 location indicated their pericyte phenotype. A contribution of skin Ebf2<sup>+</sup> cells to mesenchymal  
359 cell turnover was illustrated by the *in vivo* lineage-tracing. The adjacent localization of the  
360 Ebf2<sup>+</sup> cells to the AML cells in skin indicated a possibility that these cells might act as a niche

361 component for maintaining AML cells. This notion was supported by another important finding  
362 showing a supportive function of skin MPCs for AML LSCs. The fractions skin Ebf2<sup>+</sup> MPCs  
363 were reduced after symptomatic AML onset, leading to a reconstructed niche, which might in  
364 turn further promote AML progression since Ebf2<sup>+</sup> cell deletion in mice accelerated AML  
365 development, as reported.<sup>6</sup>

366 In summary, we here report that skin harbors primitive Ebf2<sup>+</sup> MPCs and the downstream  
367 Ebf2<sup>-</sup> MPCs. These MPCs are colocalized with AML cells at perivascular sites during AML  
368 development. The residual AML cells in the skin after chemotherapy can regenerate leukemia  
369 post-transplantation, indicating the existence of AML LSCs in the skin. The skin MPCs can  
370 provide metabolic support for AML cells to protect them from chemotherapy *in vitro*. Loss of  
371 *Lama4* in skin MPCs further enhances their supportive and chemoprotective function for the  
372 leukemic cells. We for the first time provide evidence for the roles of skin mesenchymal cell  
373 niche for AML LSC growth and chemotherapy response, as well as the impact of *Lama4*  
374 expression on the niche protection or support. These findings warrant future studies on the role  
375 of skin mesenchymal niches in chemotherapy response and relapse of AML patients.

376

## 377 **Methods**

### 378 **Mice**

379 *Ebf2-Egfp* reporter FVB/N mice<sup>22</sup> at 8 to 14-week old were used. Transgenic *Ebf2-EgfpXEbf2-*  
380 *Cre<sup>ERT2</sup>X Rosa26<sup>loxp</sup>Stop<sup>loxp</sup>-Tomato* mice were generated by crossing *Ebf2-Egfp* with *Ebf2-*  
381 *Cre<sup>ERT2</sup>XRosa26<sup>loxp</sup>Stop<sup>loxp</sup>-Tomato* mice for lineage tracing. To activate Cre, tamoxifen (TAM)  
382 (Sigma) was intraperitoneally injected at 3mg/20g body weight for 3 times every second day.<sup>6</sup>  
383 *Lama4<sup>-/-</sup>* C57BL/6 mice were generated as described.<sup>55</sup> All mice were maintained in specific-  
384 pathogen-free conditions in the animal facility of Karolinska Institute. Animal procedures were  
385 approved by local ethics committee (ethical number 1869) at Karolinska Institute (Stockholm,  
386 Sweden).

387

### 388 ***In vivo* lineage tracing**

389 This was performed as previously described.<sup>6</sup> Dorsal skin from triple transgenic *Ebf2-Egfp* x  
390 *Ebf2-Cre<sup>ERT2</sup> x Rosa26<sup>loxp</sup>Stop<sup>loxp</sup>- Tomato* mice<sup>6</sup> were collected at 3, 6 and 12 months after  
391 tamoxifen injection. Approximately, 1x1cm of dorsal skin tissue was fixed and embedded in  
392 OCT for whole mount immunofluorescence. For evaluating the frequency of Ebf2<sup>+</sup> cells and  
393 their progeny (Tomato<sup>+</sup>), 2 x 2cm of dorsal skin tissue was processed for skin MPC isolation

394 by fluorescence-activated cell sorting (FACS) (BD FACS Aria<sup>TM</sup> III). For defining the gates  
395 for GFP<sup>+</sup> and Tomato<sup>+</sup> cells, cells from bi-transgenic or single transgenic mouse were used as  
396 fluorescence-minus one (FMO) controls. After excluding dead cells by propidium iodide (PI)  
397 staining, the CD45<sup>-</sup>TER119<sup>-</sup>CD31<sup>-</sup> stromal cells were gated. Subsequently, the CD44<sup>-</sup> fractions  
398 were divided based on CD140a and SCA1 expression.

399

400 **Ara-C treatment and detection of residual AML cells *in vivo*** was performed as described  
401 in the related study<sup>35</sup>.

#### 402 **Skin MPC isolation by FACS**

403 Mouse dorsal skin was minced and digested with 0.2% collagenase II (CLSII Worthington  
404 Biochemicals) in PBS supplemented with 20% FBS for 60 minutes at 37°C. After washing  
405 with PBS/20%FBS followed by PBS, the digested skin tissue was treated with 0.05% trypsin-  
406 EDTA (GIBCO) for 10 to 15minutes at 37°C. Cell suspension was spun down at 300g for  
407 10minutes. Mononuclear cells were then blocked with FcR (CD16/32) antibody and stained  
408 with CD45, TER119, CD31, CD44, CD140a, and SCA1 for 15minutes at 2-8°C. Dead cells  
409 were excluded by propidium iodide (PI) staining. For sorting native skin MPCs, hematopoietic  
410 and endothelial populations were firstly excluded (CD45<sup>-</sup>TER119<sup>-</sup>CD31<sup>-</sup>) and Ebf2 gate was  
411 then defined based on Fluorescence Minus One (FMO) using skin mononuclear cells from a  
412 non-transgenic mouse. Skin Ebf2<sup>+</sup> and Ebf2<sup>-</sup> cells were sorted on a FACS Aria III Sorp (BD  
413 Biosciences, San Jose). See Table S1 for detailed antibody information.

#### 414 **Generation of MLL-AF9-induced AML mouse model**

415 AML mouse model was induced as previously described.<sup>6</sup> Briefly, 250.000 MLL-AF9  
416 expressing cells were intravenously injected into non-irradiated mice to generate the AML  
417 mouse model. For detecting AML infiltration in dorsal skin tissue, 1x10<sup>6</sup> of MLL-AF9  
418 previously generated in DsRed C57BL/6J transgenic mice<sup>56</sup> were intravenously injected into  
419 sublethally irradiated (6Gy) *Lama4*<sup>+/+</sup> and *Lama4*<sup>-/-</sup> mice, as described<sup>35</sup>. At day 15, the mice  
420 were treated intraperitoneally with Cytarabine (Ara-C, Jena Bioscience) at the dose of  
421 700mg/kg body weight, daily for 5 consecutive days. The mice were sacrificed one day after  
422 the last injection for AML engraftment analysis in peripheral blood (PB), BM and dorsal skin  
423 by FACS. The distribution of residual AML cells in dorsal skin was visualized by confocal  
424 imaging.

425

426 **Serial transplantation**

427 To test the leukemia-initiating capacity of the AML cells infiltrated in skin tissue, the AML  
428 CD45.1<sup>+</sup> cells were sorted from skin tissue of the mice that have developed AML post-AML  
429 cell injection. The mice were treated with normal saline or Ara-C for 5 days at day 20-21 after  
430 AML cell injection. The AML cells in skin were collected 2-3days after the last injection,  
431 sorted by FACS and transplanted into non-irradiated secondary C57BL/6J recipient mice via  
432 tail vein at a dose of 1000 or 5000 cells per mouse. The AML development was monitored by  
433 blood analysis using FACS and Sysmex as well as by assessing the general health conditions.  
434 The survival rate of the mice was estimated based on the date when the mice were found dead  
435 or in moribund status. Bones and blood were collected for determining AML engraftment.

436

437 **Multilineage differentiation assay**

438 This was done as described <sup>6</sup>. The skin Ebf2<sup>+</sup>, Ebf2<sup>-</sup> and Ebf2<sup>-</sup>PαS cells were expanded in  
439 culture and plated at 400cells / cm<sup>2</sup> to each well of 24-well plate. For osteogenic differentiation,  
440 cells were cultured with complete osteogenic medium mixed by human/mouse StemXVivo  
441 osteogenic / adipogenic base medium (CCM007, R&D Systems) and mouse StemXVivo  
442 osteogenic supplement (CCM009; R&D Systems) under normoxic condition for 14-21 days.  
443 Differentiation toward osteoblast was evaluated by 1% alizarin red S (Catalog no A5533,  
444 Sigma) staining after cell fixation with cold methanol. For adipogenic differentiation, the  
445 culture was performed with DMEM containing 10% FBS, 10mM HEPES (1M), 100U of  
446 penicillin/streptomycin, 10<sup>-4</sup> M 2-Mercaptoethanol (Sigma, catalog no.M7522), 5μg/mL  
447 insulin (Catalog no I6634, Sigma), 20μM Indomethacin (Catalog no I7378, Sigma), 0.0115  
448 mg/mL isobutylmethylxanthine (Catalog no I-7018, Sigma), and 10<sup>-6</sup> M dexamethasone  
449 (Catalog no D2915, Sigma) for 2-3 weeks. Cells were then fixed with 10% formalin and stained  
450 with 0.5% Oil Red O (Catalog no O1391, Sigma). Chondrogenic differentiation was induced  
451 in monolayer culture where cells were cultured with DMEM high glucose containing 10mM  
452 HEPES (1M), 100U of penicillin / streptomycin, 10<sup>-4</sup> M 2-Mercaptoethanol (catalog no.M7522,  
453 Sigma), 2mM pyruvate (Catalog no P5280, Sigma), 0.35mM L-proline (Catalog no P5607-  
454 25G, Sigma), ITS<sup>+3</sup> (Catalog no I-3146, Sigma), 5μg/mL L-ascorbic acid 2-phosphate (Catalog  
455 no A7506, Sigma), 10<sup>-7</sup> M dexamethasone (Catalog No D2915, Sigma), and 10ng/mL TGF-β3  
456 (Catalog no 100-36E, Peprotech). To assess chondrogenic differentiation, toluidine blue  
457 (Catalog no T3260, Sigma) (pH 2.0 to 2.5) was used to stain proteoglycan. Images were then  
458 taken under inverted microscope (CKX41, Olympus).

459

#### 460 ***In vitro* chondrogenic induction in micromass pellet**

461 After *in vitro* expansion,  $2.5 \times 10^5$  of BM MSCs or skin Ebf2<sup>+</sup> or skin Ebf2<sup>+</sup>PaS MPCs were  
462 collected in 15mL tube and spun down at 300g for 7 minutes. After removal of supernatant,  
463 500  $\mu$ M of chondrogenic medium consisting of DMEM high glucose with 10 mM HEPES,  
464 100U of penicillin/streptomycin,  $10^{-4}$ M 2-Mercaptoethanol (catalog no.M7522, Sigma), 2 mM  
465 pyruvate (Catalog no P5280, Sigma), 0.35 mM L-proline (Catalog no. P5607-25G, Sigma),  
466 ITS<sup>+</sup>3 (Catalog no. I-3146, Sigma), 5 $\mu$ g/mL L-ascorbic acid 2-phosphate (Catalog no. A7506,  
467 Sigma),  $10^{-7}$ M dexamethasone (Catalog No. D2915, Sigma,), and 10ng/mL TGF- $\beta$ 3 (Catalog  
468 no. 100-36E, Peprotech) were added. The chondrogenic induction was performed in 37°C  
469 under hypoxic condition (2% O<sub>2</sub>). Every 2-3 days, the medium was replaced until day 28. For  
470 evaluating the chondrogenic induction, the micromass pellets were washed with PBS prior  
471 being fixed in 4% PFA for 2 days. After dehydration with 70% ethanol, the pellets were stained  
472 with toluidine blue (Catalog no. T3260, Sigma) at pH 2.0 to 2.5 for 15–30 minutes. Thereafter,  
473 the stained pellets were washed with 70% ethanol and embedded in OCT-compound (Catalog  
474 no. 4583, Sakura Tissue Tex®). To visualize the formation of proteoglycan, the embedded  
475 pellet was cut to 10 $\mu$ m, mounted and observed by inverted microscope (Axio Observer.Z1,  
476 Zeis). Images were processed with Zen software (Carl Zeiss Microscopy, GmbH 2011).

477

#### 478 **Skin MPC expansion and proliferation kinetics *in vitro***

479 For *in vitro* expansion, CFU-Fs from FACS-sorted skin Ebf2<sup>+</sup> and Ebf2<sup>+</sup>PaS cells were  
480 trypsinized with 0.05% trypsin-EDTA (GIBCO), collected, and plated to T-25 flasks at 400  
481 cells /cm<sup>2</sup>. Cells were then expanded in complete Dulbecco modified Eagle Medium (DMEM,  
482 catalog no.31966, GIBCO) containing 10% FBS, 10 mM HEPES (1M), 100U of penicillin /  
483 streptomycin, and  $10^{-4}$ M 2-Mercaptoethanol (catalog no.M7522, Sigma) under hypoxic  
484 condition (1-2% O<sub>2</sub>) until 80%-90% confluence was reached. Proliferation rates of skin Ebf2<sup>+</sup>  
485 and Ebf2<sup>+</sup>PaS cells were evaluated by population doubling time (PDT) assays. PDT was  
486 calculated by dividing number of days for culturing the cells with number of population  
487 doublings (PDs) using following formula: PDT= Culture time (days)/PD where PD=log  
488 (NH/NI)/ log 2, NH is harvested cell number and NI is initial cell number.

489

#### 490 **Dorsal skin wholemount immunofluorescence staining**

491 Dorsal skin specimens were fixed in 4% PFA for 10 minutes followed by washing with PBS  
492 prior embedding in OCT-Compound (Sakura Tissue Tex®, Catalog no. 4583). For  
493 immunofluorescence staining, 150  $\mu$ M dorsal skin sections were first blocked with skim milk,  
494 fish skin gelatin (Catalog no. G7765, Sigma) and Triton X-100 (Catalog no. T8787, Sigma) for  
495 1 hour at RT. To visualize Ebf2<sup>+</sup> cells in mouse dorsal skin, the sections were incubated with  
496 anti-GFP, additionally stained with either anti-mouse MECA32, CD31, NG2, NESTIN, or  $\alpha$ -  
497 SMA antibodies. All stainings were performed at 2-8°C overnight prior washing with PBS and  
498 staining with secondary antibody. Imaging was performed with confocal microscopy at Live  
499 Cell Imaging (LCI) facility after the section was mounted in Mountant PermaFlour (Catalog  
500 no. TA-030-F19, Thermo). See Table S2 for antibodies used for the confocal imaging.

501 Quantification of the Ebf2<sup>+</sup> or Ebf2/GFP-Tomato<sup>+</sup> cells expressing NESTIN, NG2 or  $\alpha$ -SMA  
502 was performed with NIS-element AR-analysis ver 5.20.00 64-bit software (Nikon). From  
503 100 $\mu$ M section, 30-40 $\mu$ M thickness was scanned with a confocal microscope to localize Ebf2<sup>+</sup>  
504 and Ebf2<sup>+</sup> progenies (Ebf2/GFP-Tomato<sup>+</sup> cells). Areas where Ebf2<sup>+</sup> and Ebf2/GFP-Tomato<sup>+</sup>  
505 cells were distributed were further imaged every 1-1.1 $\mu$ M depth to obtain Region of interest  
506 (ROI). Within ROI, positive expression of NESTIN, NG2 or  $\alpha$ -SMA was defined based on  
507 control sections stained with secondary antibodies only while GFP<sup>+</sup> signal was set based on  
508 samples from non-GFP reporter mice. Three to 4 mice were included for the quantification.

509

### 510 **RNA sequencing**

511 Total RNA from freshly sorted skin Ebf2<sup>+</sup> cells, skin Ebf2<sup>-</sup> P $\alpha$ S cells and BM MSCs were  
512 isolated with RNeasy Micro Kit (Qiagen) according to the manufacturer's protocol. cDNA was  
513 prepared using SMART-Seq v4 Ultra Low Input RNA Kit for Sequencing (Cat. No. 634898,  
514 Takara Bio.). The cDNA quality was examined on Agilent TapeStation system using a High  
515 Sensitivity D5000 ScreenTape (Cat. No. 5067-5592, Agilent). One ng cDNA was used for  
516 library preparation using *Nextera XT* DNA Library Preparation Kit (Cat. Nos. FC-131-1024 &  
517 FC-131-1096, Illumina). The yield and quality of the amplified libraries were analyzed using  
518 Qubit by Thermo Fisher and the Agilent TapeStation System. The indexed cDNA libraries were  
519 sequenced on the Illumina 2000 or Nextseq 550 (Illumina, San Diego, CA) for a 75-cycle v2  
520 sequencing run generating 75 bp single-end reads. About 7-20 million reads/sample were  
521 obtained. Sample quality was assessed using FastQC (v0.11.8) and MultiQC (v1.7). Reads  
522 were aligned to a reference built from Ensembl GRCm38 genome sequences using STAR  
523 (v2.6.1d). All mapped counts to each gene were further calculated by FeatureCounts function



524 from Subread package<sup>57</sup> installed in R. Genes with Reads Per Kilobase of transcript per Million  
525 mapped reads (RPKM) values more than 0.1 were considered as being actively transcribed and  
526 proceeded to the analysis of Differential Gene Expression (DGE).<sup>58</sup> The normalized read  
527 counts assigned to each sample were generated by Deseq2. The differentially expressed genes  
528 between the cell subsets were identified by adjusted *P* value (*p*<sub>adj</sub> < 0.05) using Benjamini-  
529 Hochberg correction for multiple testing, together with thresholds at log<sub>2</sub>fold changes >1 (up-  
530 regulated) or <-1 (down-regulated). For the Gene Set Enrichment Analysis (GSEA), the  
531 normalized read counts were imported into the GSEA (v4.0.3) platform from Broad Institute  
532 (<http://www.broadinstitute.org/gsea/index.jsp>), with three gene sets being tested, including  
533 gene ontology (c5.all.v5.symbols.gmt), hallmark (h.all.v5.symbols.gmt) and KEGG  
534 (c2.kegg.v5.symbols.gmt). Gene sets tested were considered to be statistically enriched when  
535 the nominal *P* value < .01 and FDR < .25.

536

#### 537 **LIN<sup>-</sup>SCA1<sup>+</sup>KIT<sup>+</sup> (LSK) CD150<sup>+</sup> cell isolation**

538 Mouse femurs, tibia and iliac crest were crushed and washed with PBS/5% FBS to obtain BM  
539 mononuclear cells. Hematopoietic lineage (LIN) markers TER119, B220, GR-1, CD3, CD11b  
540 were firstly depleted with the use of sheep anti-rat Dynal beads (Invitrogen). LIN-depleted  
541 cells were then stained with anti-SCA1, anti-KIT, anti-CD150 and PE-CY5-conjugated  
542 antibodies against the LIN markers mentioned above. After excluding dead cells based on  
543 propidium iodide (PI) staining, the LSKCD150<sup>+</sup> HSCs were sorted on BD FACS Aria III (BD  
544 Biosciences, San Jose) using DIVA 7.0 software. The gating was defined based on fluorescence  
545 minus one (FMO). See table S1 for antibody detail information.

546

#### 547 **Co-culture of skin MPCs with LSKCD150<sup>+</sup> cells and colony-forming cell in culture (CFU- 548 C) assay**

549 Twenty-five thousand (25,000) expanded Ebf2<sup>+</sup> or Ebf2<sup>-</sup>PαS MPCs from skin and BM at  
550 passage 4-13 were plated into each well of 12-well plate and maintained in complete Dulbecco  
551 modified Eagle Medium (DMEM, catalog no.31966, GIBCO) containing 10% FBS, 10 mM  
552 HEPES (1M), 100U of penicillin/streptomycin and 10<sup>-4</sup>M 2-Mercaptoethanol (catalog  
553 no.M7522, Sigma) under hypoxic condition (2% O<sub>2</sub>) for 24h prior co-culture. The co-cultures  
554 were started by plating 2000 sorted LSKCD150<sup>+</sup> to each well in Myelocult medium (M5300,  
555 Stem Cell Technologies) supplemented with 10<sup>-6</sup> M hydrocortisone (Catalog no 74142, Stem  
556 Cell Technologies,) and 1% penicillin streptomycin. After a 3-day co-culture in 5% CO<sub>2</sub> at

557 37°C, the medium containing hematopoietic cells and trypsinized cells were collected for  
558 FACS analysis and CFU-C assay in Methylcellulose M3434 (Stem Cell Technologies). After  
559 10 days of culture at 37°C in 5% CO<sub>2</sub>, CFU-Cs in the methylcellulose were stained with 2,7-  
560 diaminofluorene (DAF staining) and scored with an inverted microscope (CKX41, Olympus).  
561 A cell cluster with a minimum of 50 cells is defined as one colony. Colonies with positive DAF  
562 staining were defined as erythrocytes-containing colonies including CFU-GME and BFU-E),  
563 as performed previously.<sup>9 59</sup>

564

### 565 **Cobblestone area-forming cells (CAFC) assay using primary skin MPCs**

566 This was done as previously described.<sup>60</sup> Briefly, 30,000 skin or BM Ebf2<sup>+</sup> or Ebf2-PαS MPCs  
567 were first plated into a 24-multiwell plate and maintained in complete Dulbecco modified  
568 Eagle Medium (DMEM, catalog no.31966, GIBCO) containing 10% FBS, 10mM HEPES  
569 (1M), 100U of penicillin/streptomycin, and 10<sup>-4</sup>M 2-Mercaptoethanol (catalog  
570 no.M7522,Sigma) under hypoxic condition (1% O<sub>2</sub>). One day after, 150-300 MLL-AF9 or LSK  
571 cells were then added on the MSCs and MPCs in Myelocult (M5300, Stem Cell Technologies)  
572 with 10<sup>-6</sup> M hydrocortisone (Catalog no. 07904, Stem Cell Technologies,), 1% penicillin  
573 streptomycin and 1ng/mL IL-3 (R&D). The co-cultures were performed at 32°C in 5% CO<sub>2</sub> for  
574 7-14 days. A CAFC was defined as a cluster of more than 3 cells underneath the MSCs/MPCs.  
575 The CAFCs were visualized and scored with inverted microscope (CKX41, Olympus) on day  
576 7 and 10. At day 10-14, the cells were trypsinized and collected for FACS analysis of the KIT<sup>+</sup>  
577 and CD36<sup>+</sup> AML LSCs and their cell cycle status.

578

### 579 **Detection of reactive oxygen species (ROS) level**

580

581 The MSCs/MPCs or AML cells were harvested and washed with PBS and incubated with 2μM  
582 of H<sub>2</sub>-DCFDA (C6827, ThermoFisher) in DMEM at 37°C for 40min to detect ROS level. The  
583 cells were then rinsed twice with PBS and resuspended with 150μL of Propidium iodide  
584 (1:1000) in 5%FBS/PBS. ROS levels were measured by FACS.

585

### 586 **Mitochondrial transfer**

587 MSCs or MPCs were stained with 100nM MitoTracker™ red FM (M22426, ThermoFisher) at  
588 37°C for 60 min, according to the manufacturer's instructions. The cells were washed twice  
589 with PBS, then incubated for 3-4 hours to remove unbound probe before a final wash.  
590 Subsequently, 15,000-25,000 MLL-AF9 AML cells in Myelocult (M5300, StemCell

591 Technologies) were plated and cocultured with prelabelled MSCs for 24 hours. Mitochondrial  
592 transfer was quantified in AML cells (CD45.1<sup>+</sup>) by FACS and analyzed for MFI of the  
593 mitoTracker red.

594

595

596 **Colony-forming unit-fibroblast (CFU-F), RNA sequencing and quantitative RT-PCR (Q-**  
597 **PCR)** were done as described.<sup>6,35</sup> See Table S3 for information of Assays-on-Demand probes.

598

### 599 **Statistical analysis**

600 Unless mentioned, either unpaired t-test or Mann-Whitney test was used to determine the  
601 difference between the groups or cell subsets. All statistical tests were performed with  
602 GraphPad Prism 8 software with P <0.05 considered statistically significant.

603

### 604 **Data availability**

605 The RNA sequencing data are available at GEO under accession number GSE167562.

606

### 607 **Acknowledgements**

608 We thank Tina Jacob, Karl Annusver and Alexandra Are at Department of Cell and Molecular  
609 Biology, Karolinska Institute, Sweden for valuable advice and technical discussion. We thank  
610 Alexandre Piccini, Yuanyuan Zhang and Andranik Durguryan in our group for technical help  
611 for the cell culture. We also thank Prof. Marja Ekblom, Lund University for her scientific input.  
612 This study was supported by the Swedish Research Council (2019-01361), Swedish Childhood  
613 Cancer Society (PR2015-0142, FoAss13/015, PR2017/0154, PR2020-0166), Swedish Cancer  
614 Society (CAN2017/774, 19 0092 SIA and 20 1222PjF), Åke Olsson foundation,  
615 Radiumhemmets Forskningsfonder (151241, 171162, 191253) and Karolinska Institute  
616 Wallenberg Institute for Regenerative Medicine, Karolinska Institute doctoral education (KID)  
617 funding (2-1293/2014) to support LS, Stiftelsen Clas Groschinskys Minnesfond (ref:M16 50)  
618 to H.Q., and the Swedish Research Council (2018-02963) and Swedish Cancer Society (CAN  
619 2018/793) to MK. FACS analysis and cell sorting were performed at MedH Flow Cytometry  
620 core facility (Karolinska Institute), supported by KI/SLL. The confocal images were obtained  
621 at the LCI facility/Nikon Center of Excellence, Karolinska Institute, supported by grants from  
622 the Knut and Alice Wallenberg Foundation, the Swedish Research Council, KI infrastructure,

623 Centre for Innovative Medicine and Jonasson center at the Royal Institute of Technology. All  
624 major computations were performed on resources provided by the Swedish National  
625 Infrastructure for Computing (SNIC) through Uppsala Multidisciplinary Center for Advanced  
626 Computational Science (UPPMAX) under Project sens2018540. We also would like to thank  
627 the core facility at NEO, BEA, Bioinformatics and Expression Analysis, which is supported by  
628 the board of research at the Karolinska Institute and the research committee at the Karolinska  
629 Hospital.

630

### 631 **Author contributions**

632 LS has substantially participated in designing, performing experiments, collecting and  
633 analyzing data and manuscript writing. HC, PX, MK(Kondo), XS, EL and ASJ performed  
634 experiments, collected data and assisted with data analysis and manuscript-editing. MK  
635 (Kasper) provided scientific input and assistance with confocal imaging of skin tissues. MJ  
636 provided the DsRed-expressing MLL-AF9 AML cells and scientific input on the manuscript.  
637 KT provided Lama4<sup>-/-</sup> mouse models and scientific input. HQ designed, performed experiments,  
638 collected and analyzed data, wrote the manuscript. All authors have proved the final version of  
639 the manuscript.

640 **Conflict of interest:** All authors declare no competing financial interest regarding this study.

641

### 642 **References**

643

- 644 1 Bakst, R. L., Tallman, M. S., Douer, D. & Yahalom, J. How I treat extramedullary  
645 acute myeloid leukemia. *Blood* **118**, 3785-3793, doi:10.1182/blood-2011-04-  
646 347229 (2011).
- 647 2 Gouache, E. *et al.* Leukemia Cutis in Childhood Acute Myeloid Leukemia:  
648 Epidemiological, Clinical, Biological, and Prognostic Characteristics of Patients  
649 Included in the ELAM02 Study. *Hemasphere* **2**, e141,  
650 doi:10.1097/HS9.000000000000141 (2018).
- 651 3 Wang, C. X., Pusic, I. & Anadkat, M. J. Association of Leukemia Cutis With Survival  
652 in Acute Myeloid Leukemia. *JAMA Dermatol* **155**, 826-832,  
653 doi:10.1001/jamadermatol.2019.0052 (2019).
- 654 4 Krooks, J. A. & Weatherall, A. G. Leukemia cutis in acute myeloid leukemia signifies  
655 a poor prognosis. *Cutis* **102**, 266;271;272 (2018).

- 656 5 Hoggatt, J., Kfoury, Y. & Scadden, D. T. Hematopoietic Stem Cell Niche in Health and  
657 Disease. *Annual review of pathology* **11**, 555-581, doi:10.1146/annurev-pathol-  
658 012615-044414 (2016).
- 659 6 Xiao, P. *et al.* Distinct roles of mesenchymal stem and progenitor cells during the  
660 development of acute myeloid leukemia in mice. *Blood advances* **2**, 1480-1494,  
661 doi:10.1182/bloodadvances.2017013870 (2018).
- 662 7 Raaijmakers, M. H. *et al.* Bone progenitor dysfunction induces myelodysplasia and  
663 secondary leukaemia. *Nature* **464**, 852-857, doi:nature08851 [pii]  
664 10.1038/nature08851 (2010).
- 665 8 Dong, L. *et al.* Leukaemogenic effects of Ptpn11 activating mutations in the stem  
666 cell microenvironment. *Nature* **539**, 304-308, doi:10.1038/nature20131 (2016).
- 667 9 Xiao, P. *et al.* Sipa1 deficiency-induced bone marrow niche alterations lead to the  
668 initiation of myeloproliferative neoplasm. *Blood advances* **2**, 534-548,  
669 doi:10.1182/bloodadvances.2017013599 (2018).
- 670 10 Hanoun, M. *et al.* Acute myelogenous leukemia-induced sympathetic neuropathy  
671 promotes malignancy in an altered hematopoietic stem cell niche. *Cell stem cell* **15**,  
672 365-375, doi:10.1016/j.stem.2014.06.020 (2014).
- 673 11 Schepers, K. *et al.* Myeloproliferative neoplasia remodels the endosteal bone  
674 marrow niche into a self-reinforcing leukemic niche. *Cell Stem Cell* **13**, 285-299,  
675 doi:10.1016/j.stem.2013.06.009 (2013).
- 676 12 Kim, J. A. *et al.* Microenvironmental remodeling as a parameter and prognostic  
677 factor of heterogeneous leukemogenesis in acute myeloid leukemia. *Cancer Res*,  
678 doi:10.1158/0008-5472.CAN-14-3379 (2015).
- 679 13 Jeong, S. Y., Kim, J. A. & Oh, I. H. The Adaptive Remodeling of Stem Cell Niche in  
680 Stimulated Bone Marrow Counteracts the Leukemic Niche. *Stem Cells*,  
681 doi:10.1002/stem.2870 (2018).
- 682 14 Han, J. *et al.* Adipose tissue is an extramedullary reservoir for functional  
683 hematopoietic stem and progenitor cells. *Blood* **115**, 957-964, doi:10.1182/blood-  
684 2009-05-219923 (2010).
- 685 15 Ye, H. *et al.* Leukemic Stem Cells Evade Chemotherapy by Metabolic Adaptation to  
686 an Adipose Tissue Niche. *Cell Stem Cell* **19**, 23-37, doi:10.1016/j.stem.2016.06.001  
687 (2016).
- 688 16 Toma, J. G. *et al.* Isolation of multipotent adult stem cells from the dermis of  
689 mammalian skin. *Nat Cell Biol* **3**, 778-784, doi:Doi 10.1038/Ncb0901-778 (2001).
- 690 17 Kimlin, L. & Virador, V. Cellular populations isolated from newborn mouse skin  
691 including mesenchymal stem cells. *Methods in molecular biology* **989**, 217-233,  
692 doi:10.1007/978-1-62703-330-5\_17 (2013).
- 693 18 Viswanathan, S. *et al.* Mesenchymal stem versus stromal cells: International  
694 Society for Cell & Gene Therapy (ISCT(R)) Mesenchymal Stromal Cell committee  
695 position statement on nomenclature. *Cytotherapy* **21**, 1019-1024,  
696 doi:10.1016/j.jcyt.2019.08.002 (2019).
- 697 19 Vaculik, C. *et al.* Human dermis harbors distinct mesenchymal stromal cell subsets.  
698 *J Invest Dermatol* **132**, 563-574, doi:10.1038/jid.2011.355 (2012).
- 699 20 Morikawa, S. *et al.* Prospective identification, isolation, and systemic  
700 transplantation of multipotent mesenchymal stem cells in murine bone marrow. *J*  
701 *Exp Med* **206**, 2483-2496, doi:jem.20091046 [pii]  
702 10.1084/jem.20091046 (2009).

- 703 21 Pinho, S. *et al.* PDGFRalpha and CD51 mark human Nestin+ sphere-forming  
704 mesenchymal stem cells capable of hematopoietic progenitor cell expansion. *J Exp*  
705 *Med* **210**, 1351-1367, doi:10.1084/jem.20122252 (2013).
- 706 22 Qian, H. *et al.* Molecular characterization of prospectively isolated multipotent  
707 mesenchymal progenitors provides new insight into the cellular identity of  
708 mesenchymal stem cells in mouse bone marrow. *Molecular and cellular biology* **33**,  
709 661-677, doi:10.1128/MCB.01287-12 (2013).
- 710 23 Armulik, A., Genove, G. & Betsholtz, C. Pericytes: developmental, physiological, and  
711 pathological perspectives, problems, and promises. *Developmental cell* **21**, 193-  
712 215, doi:10.1016/j.devcel.2011.07.001 (2011).
- 713 24 Kusumbe, A. P. *et al.* Age-dependent modulation of vascular niches for  
714 haematopoietic stem cells. *Nature* **532**, 380-384, doi:10.1038/nature17638  
715 (2016).
- 716 25 Baryawno, N. *et al.* A Cellular Taxonomy of the Bone Marrow Stroma in  
717 Homeostasis and Leukemia. *Cell* **177**, 1915-1932 e1916,  
718 doi:10.1016/j.cell.2019.04.040 (2019).
- 719 26 Alonso, S. *et al.* Human bone marrow niche chemoprotection mediated by  
720 cytochrome P450 enzymes. *Oncotarget* **6**, 14905-14912 (2015).
- 721 27 Jin, L. *et al.* CXCR4 up-regulation by imatinib induces chronic myelogenous  
722 leukemia (CML) cell migration to bone marrow stroma and promotes survival of  
723 quiescent CML cells. *Mol Cancer Ther* **7**, 48-58, doi:10.1158/1535-7163.MCT-07-  
724 0042 (2008).
- 725 28 Iwamoto, S., Mihara, K., Downing, J. R., Pui, C. H. & Campana, D. Mesenchymal cells  
726 regulate the response of acute lymphoblastic leukemia cells to asparaginase. *J Clin*  
727 *Invest* **117**, 1049-1057, doi:10.1172/JCI30235 (2007).
- 728 29 Zhang, B. *et al.* Microenvironmental protection of CML stem and progenitor cells  
729 from tyrosine kinase inhibitors through N-cadherin and Wnt-beta-catenin  
730 signaling. *Blood* **121**, 1824-1838, doi:10.1182/blood-2012-02-412890 (2013).
- 731 30 Xu, X. *et al.* BM microenvironmental protection of CML cells from imatinib through  
732 Stat5/NF-kappaB signaling and reversal by Wogonin. *Oncotarget* **7**, 24436-24454,  
733 doi:10.18632/oncotarget.8332 (2016).
- 734 31 Somervaille, T. C. & Cleary, M. L. Identification and characterization of leukemia  
735 stem cells in murine MLL-AF9 acute myeloid leukemia. *Cancer Cell* **10**, 257-268,  
736 doi:10.1016/j.ccr.2006.08.020 (2006).
- 737 32 Landberg, N. *et al.* CD36 defines primitive chronic myeloid leukemia cells less  
738 responsive to imatinib but vulnerable to antibody-based therapeutic targeting.  
739 *Haematologica* **103**, 447-455, doi:10.3324/haematol.2017.169946 (2018).
- 740 33 Farge, T. *et al.* Chemotherapy-Resistant Human Acute Myeloid Leukemia Cells Are  
741 Not Enriched for Leukemic Stem Cells but Require Oxidative Metabolism. *Cancer*  
742 *discovery* **7**, 716-735, doi:10.1158/2159-8290.CD-16-0441 (2017).
- 743 34 Duarte, D. *et al.* Inhibition of Endosteal Vascular Niche Remodeling Rescues  
744 Hematopoietic Stem Cell Loss in AML. *Cell Stem Cell* **22**, 64-77 e66,  
745 doi:10.1016/j.stem.2017.11.006 (2018).
- 746 35 Cai, H. *et al.* Critical Role of Lama4 for Hematopoiesis Regeneration and Acute  
747 Myeloid Leukemia Progression. *Blood*, doi:10.1182/blood.2021011510 (2021).
- 748 36 Ahsberg, J. *et al.* Progression of progenitor B-cell leukemia is associated with  
749 alterations of the bone marrow micro-environment. *Haematologica* **105**, e102-  
750 e106, doi:10.3324/haematol.2018.214031 (2020).

- 751 37 Poulos, M. G. *et al.* Endothelial Jagged-1 is necessary for homeostatic and  
752 regenerative hematopoiesis. *Cell reports* **4**, 1022-1034,  
753 doi:10.1016/j.celrep.2013.07.048 (2013).
- 754 38 Calvi, L. M. *et al.* Osteoblastic cells regulate the haematopoietic stem cell niche.  
755 *Nature* **425**, 841-846 (2003).
- 756 39 Greenbaum, A. *et al.* CXCL12 in early mesenchymal progenitors is required for  
757 haematopoietic stem-cell maintenance. *Nature* **495**, 227-230,  
758 doi:10.1038/nature11926 (2013).
- 759 40 Omatsu, Y. *et al.* The essential functions of adipo-osteogenic progenitors as the  
760 hematopoietic stem and progenitor cell niche. *Immunity* **33**, 387-399,  
761 doi:10.1016/j.immuni.2010.08.017 (2010).
- 762 41 Arai, F. *et al.* Tie2/angiopoietin-1 signaling regulates hematopoietic stem cell  
763 quiescence in the bone marrow niche. *Cell* **118**, 149-161 (2004).
- 764 42 Thoren, L. A. *et al.* Kit regulates maintenance of quiescent hematopoietic stem  
765 cells. *J Immunol* **180**, 2045-2053 (2008).
- 766 43 Gu, Y. C. *et al.* Laminin isoform-specific promotion of adhesion and migration of  
767 human bone marrow progenitor cells. *Blood* **101**, 877-885 (2003).
- 768 44 Susek, K. H. *et al.* Bone marrow laminins influence hematopoietic stem and  
769 progenitor cell cycling and homing to the bone marrow. *Matrix Biol* **67**, 47-62,  
770 doi:10.1016/j.matbio.2018.01.007 (2018).
- 771 45 Stier, S. *et al.* Osteopontin is a hematopoietic stem cell niche component that  
772 negatively regulates stem cell pool size. *J Exp Med* **201**, 1781-1791 (2005).
- 773 46 Batsivari, A. *et al.* Dynamic responses of the haematopoietic stem cell niche to  
774 diverse stresses. *Nat Cell Biol* **22**, 7-17, doi:10.1038/s41556-019-0444-9 (2020).
- 775 47 Moschoi, R. *et al.* Protective mitochondrial transfer from bone marrow stromal  
776 cells to acute myeloid leukemic cells during chemotherapy. *Blood* **128**, 253-264,  
777 doi:10.1182/blood-2015-07-655860 (2016).
- 778 48 Marlein, C. R. *et al.* NADPH oxidase-2 derived superoxide drives mitochondrial  
779 transfer from bone marrow stromal cells to leukemic blasts. *Blood* **130**, 1649-  
780 1660, doi:10.1182/blood-2017-03-772939 (2017).
- 781 49 Qian, H., Le Blanc, K. & Sigvardsson, M. Primary mesenchymal stem and progenitor  
782 cells from bone marrow lack expression of CD44 protein. *The Journal of biological*  
783 *chemistry* **287**, 25795-25807, doi:10.1074/jbc.M112.339622 (2012).
- 784 50 Qian, H. *et al.* Molecular characterization of prospectively isolated multipotent  
785 mesenchymal progenitors provides new insight into the cellular identity of  
786 mesenchymal stem cells in mouse bone marrow. *Mol Cell Biol* **33**, 661-677,  
787 doi:10.1128/MCB.01287-12 (2013).
- 788 51 Wang, W. *et al.* Aberrant Notch Signaling in the Bone Marrow Microenvironment  
789 of Acute Lymphoid Leukemia Suppresses Osteoblast-Mediated Support of  
790 Hematopoietic Niche Function. *Cancer Res* **76**, 1641-1652, doi:10.1158/0008-  
791 5472.CAN-15-2092 (2016).
- 792 52 Parsi, M., Go, M. S. & Ahmed, A. in *StatPearls* (2020).
- 793 53 Forte, D. *et al.* Bone Marrow Mesenchymal Stem Cells Support Acute Myeloid  
794 Leukemia Bioenergetics and Enhance Antioxidant Defense and Escape from  
795 Chemotherapy. *Cell Metab*, doi:10.1016/j.cmet.2020.09.001 (2020).
- 796 54 Kode, A. *et al.* FoxO1-dependent induction of acute myeloid leukemia by  
797 osteoblasts in mice. *Leukemia* **30**, 1-13, doi:10.1038/leu.2015.161 (2016).
- 798 55 Thyboll, J. *et al.* Deletion of the laminin alpha4 chain leads to impaired microvessel  
799 maturation. *Mol Cell Biol* **22**, 1194-1202 (2002).

- 800 56 Hartwell, K. A. *et al.* Niche-based screening identifies small-molecule inhibitors of  
801 leukemia stem cells. *Nat Chem Biol* **9**, 840-848, doi:10.1038/nchembio.1367  
802 (2013).
- 803 57 Liao, Y., Smyth, G. K. & Shi, W. The Subread aligner: fast, accurate and scalable read  
804 mapping by seed-and-vote. *Nucleic acids research* **41**, e108,  
805 doi:10.1093/nar/gkt214 (2013).
- 806 58 Mortazavi, A., Williams, B. A., McCue, K., Schaeffer, L. & Wold, B. Mapping and  
807 quantifying mammalian transcriptomes by RNA-Seq. *Nat Methods* **5**, 621-628,  
808 doi:10.1038/nmeth.1226 (2008).
- 809 59 McGuckin, C. P., Forraz, N. & Liu, W. M. Diaminofluorene stain detects erythroid  
810 differentiation in immature haemopoietic cells treated with EPO, IL-3, SCF,  
811 TGFbeta1, MIP-1alpha and IFNgamma. *European journal of haematology* **70**, 106-  
812 114 (2003).
- 813 60 van Os, R. P., Dethmers-Ausema, B. & de Haan, G. In vitro assays for cobblestone  
814 area-forming cells, LTC-IC, and CFU-C. *Methods Mol Biol* **430**, 143-157,  
815 doi:10.1007/978-1-59745-182-6\_10 (2008).
- 816  
817

## 818 **Figure Legends**

819

### 820 **Figure 1 AML cells infiltrated in skin are capable to regenerate AML post-** 821 **transplantation**

822 (A) Strategy to generate MLL-AF9 AML mouse model. MLL-AF9 transduced AML cells  
823 expressing CD45.1 were transplanted into non-irradiated CD45.2 C57BL/6 mice.

824 (B) FACS profile showing AML engraftment analysis in BM, peripheral blood (PB) and dorsal  
825 skin at the end stage of AML. The numbers in the panel are the mean frequencies.

826 (C) Proportion of the AML cells within total hematopoietic (CD45<sup>+</sup>) cell in dorsal skin and PB.  
827 Data were from 6 independent experiments and each dot represents data from a mouse. The  
828 horizontal bars represent mean values. Paired t-test was used for statistical analysis.

829 (D) Distribution of MLL-AF9<sup>+</sup> AML cells expressing DsRed at perivascular sites in dorsal skin.  
830 The endothelial cells were marked by CD31 expression (white).

831 (E) Experimental strategy to test AML-initiating capacity of the AML cells infiltrated in mouse  
832 skin by serial transplantation. The primary recipient mice (CD45.2) that developed AML post-  
833 AML cell (CD45.1) transplantation were treated with Ara-C or saline (NS, untreated). The  
834 residual CD45.1<sup>+</sup> AML cells from skin were sorted at 2-3days after the last injection of Ara-C  
835 and transplanted into secondary non-irradiated CD45.2 C57BL/6 mice at doses of 1000 (1K)-  
836 5000 (5K) cells/mouse, respectively. The AML development was monitored by FACS and  
837 hematology analyzer Sysmex. The mice were sacrificed when found dead or moribund.



838 (F) The Kaplan-Meier survival curve of the secondary recipient mice which received skin-  
839 derived AML cells sorted from primary recipients after treatment with Ara-C or normal saline.  
840 The date was the time when the mice were found dead or moribund. The survival curve was  
841 generated by Log-rank (Mantel-Cox test).

842 (G) Platelet counts in PB of the secondary recipient mice at the endpoint.

843 (H) FACS profile showing the engraftment of skin-derived AML CD45.1<sup>+</sup> cells in BM of the  
844 secondary recipient mice.

845 (I) The engraftment levels of the skin-derived AML CD45.1<sup>+</sup> cells in BM of the secondary  
846 recipient mice.

847 (J) Spleen size of the recipient mice at the endpoint.

848 (K) The frequencies of the secondary mice that developed AML after injection of skin-derived  
849 AML cells.

850

851 **Figure 2 Identification of skin MPC subsets by Ebf2 expression.**

852 (A) A representative FACS profile showing FACS sorting/analysis of the Ebf2<sup>+</sup> and Ebf2<sup>-</sup> cells  
853 in dorsal skin. The cells were first gated within non-hematopoietic (CD45<sup>-</sup>TER119<sup>-</sup>) and non-  
854 endothelial (CD31<sup>-</sup>) live (PI<sup>-</sup>) stromal cells. Then, these cells lacking expression of CD44 were  
855 further analyzed for their expression of SCA1, PDGFRa/CD140a (PαS) and CD51. The  
856 numbers in the panel are the mean frequencies.

857 (B-C) The Ebf2<sup>+</sup> cell frequency within total PI<sup>-</sup> (B) or PI<sup>-</sup>CD45<sup>-</sup>TER119<sup>-</sup>CD31<sup>-</sup> stromal cells  
858 (C) in dorsal skin.

859 (D) The fractions of PαS cells within the Ebf2<sup>+</sup> and Ebf2<sup>-</sup> stromal cells. Each dot in B-D  
860 represents data from a single mouse in 3-6 experiments with the horizontal line as a mean value.

861 (E) CFU-Fs in the Ebf2<sup>+</sup> and Ebf2<sup>-</sup> stromal cells.

862 (F) CFU-Fs were exclusively found in the Ebf2<sup>+</sup>SCA1<sup>+</sup> cell fraction. Data in E-F are from 3  
863 independent experiments and each dot represents replicate assays from 2-3 mice in each  
864 experiment. The horizontal line represents mean value. Wilcoxon matched-signed pair rank  
865 test was used for statistical analysis.

866 (G-J) Single-cell analysis of CFU-Fs and lineage differentiation from the FACS-sorted Ebf2<sup>+</sup>  
867 (G-H) and Ebf2<sup>-</sup>PαS (I-J) stromal cells. The CFU-F frequencies (G, I) were determined by  
868 limiting dilution at a density of 1, 2, 5, 10 cells per well in a 96-well plate and the frequency  
869 of the single cells with bi-lineage plasticity (H, J) were assessed by multilineage differentiation  
870 potential of single CFU-Fs derived from the cells.

871 **(K)** Representative images of the osteogenic and adipogenic differentiation from single CFU-  
872 F clones derived from Ebf2<sup>+</sup> and Ebf2<sup>-</sup>PαS cells.

873 **(L)** Population-doubling time (PDT) of randomly selected CFU-Fs derived from single Ebf2<sup>+</sup>  
874 and Ebf2<sup>-</sup>PαS cells. Each line represents the growth kinetics of a single clone.

875 See also in Figure S1.

876

877 **Figure 3 Distribution and hierarchical relationship of skin MPCs.**

878 **(A)** Localization of Ebf2<sup>+</sup> cells in skin perivascular area (Box 1) and in dermal panniculus  
879 carnosus (DPC). The endothelial cells in the vessels were identified by MECA32 staining.

880 **(B)** Representative image showing the perivascular localization of Ebf2<sup>+</sup> cells adjacent to  
881 CD31<sup>+</sup> endothelial cells in dorsal skin.

882 **(C)** A scheme showing strategy for lineage-tracing of the Ebf2<sup>+</sup> cells in skin. The  
883 Ebf2/GFP<sup>+</sup>Tomato<sup>+</sup> cells and their progenies (Ebf2/GFP<sup>-</sup>Tomato<sup>+</sup>) were traced by FACS at 3,  
884 6, 12 months after tamoxifen injection.

885 **(D)** A representative FACS profile showing analysis of activated Ebf2<sup>+</sup> cells (GFP<sup>+</sup>Tomato<sup>+</sup>)  
886 and their progeny (GFP<sup>-</sup>Tomato<sup>+</sup>). The gates for different cell subsets were defined with FMO  
887 from bi-transgenic or single transgenic mice. Each stromal cell subset (PI<sup>-</sup>CD45<sup>-</sup>TER119<sup>-</sup>  
888 CD31<sup>-</sup>) was gated within the CD44<sup>-</sup> fractions and subsequently gated for PαS cells based on  
889 CD140a and SCA1 expression.

890 **(E)** The frequencies of Ebf2/GFP<sup>+</sup>Tomato<sup>+</sup> cells and its progenies (Ebf2/GFP<sup>-</sup>Tomato<sup>+</sup>) within  
891 stromal cells.

892 **(F)** The fractions of PαS and Ebf2<sup>-</sup>CD140a<sup>+</sup>SCA1<sup>-</sup> cells within total GFP<sup>-</sup>Tomato<sup>+</sup> cells  
893 generated by Ebf2<sup>+</sup> cells. Each dot represents data from each mouse from 2-3 independent  
894 experiments. Horizontal bars represent the mean., and unpaired *t*-test were used for statistical  
895 analysis.

896 **(G)** Distribution of the single Ebf2/GFP<sup>+</sup>Tomato<sup>-</sup> cells (green), activated Ebf2/GFP<sup>+</sup>Tomato<sup>+</sup>  
897 cells (orange) and Ebf2/GFP<sup>-</sup>Tomato<sup>+</sup> (red) cells at 3 months after tamoxifen injection.

898 See also in Figure S2-S3.

899

900 **Figure 4 Skin MPCs support AML LSC growth and protect them from chemotherapy.**

901 **(A)** Experimental strategy for assessing the role of the skin MPC and BM MSC subsets for  
902 AML growth by cobblestone area-forming cell (CAFC) assay.

903 **(B)** Representative images of CAFCs derived from the AML cells.

- 904 (C) Total numbers of CAFs generated from 150 MLL-AF9<sup>+</sup> AML cells.
- 905 (D) A proportion of residual CAFs from AML cells after Ara-C treatment relative to the  
906 normal saline (NS)-treated controls.
- 907 (E) The total number of the AML cells at 10 days after Ara-C treatment.
- 908 (F-G) The frequency (F) and the numbers (G) of the KIT<sup>+</sup> AML LSCs.
- 909 (H-I) The frequency (H) and the numbers (I) of the CD36<sup>+</sup> chemoresistant AML cells.
- 910 Data in C-I were from 3-4 independent experiments and each dot represents the mean of  
911 replicate assays. The horizontal bars represent mean values. Unpaired (C-E, G, I) or paired  
912 (F,H) *t*-test was used for statistical analysis.
- 913 (J) Co-localization of AML cells (red) with the Ebf2<sup>+</sup> cells. Ebf2 was determined by GFP  
914 (green) and the endothelial cells were marked by CD31 (white).
- 915 (K) Representative FACS plot showing analysis of Ebf2<sup>+</sup> MPCs in AML mouse dorsal skin.
- 916 (L) The frequency of the Ebf2<sup>+</sup> MPCs within stromal cells in dorsal skin tissue at endstage of  
917 AML. Data were from 6 independent experiments and each dot represents a mouse. The  
918 horizontal bars represent mean values. Unpaired *t*-test was used for statistical analysis.
- 919 (M) Representative FACS plot showing analysis of the skin Ebf2-PαS MPCs in healthy  
920 controls and AML mice.
- 921 (N) The frequency of the Ebf2-PαS cells within stromal cells in dorsal skin at the end stage of  
922 AML. Data were from 6 independent experiments and each dot represents a mouse. The  
923 horizontal bars represent mean values. Unpaired *t*-test or Mann-Whitney was used for  
924 statistical analysis.
- 925 (O) FACS profile showing analysis of CD31<sup>+</sup> cells in the dorsal skin of healthy and AML mice.
- 926 (P) The frequency of total endothelial cells (CD31<sup>+</sup>) and arteriolar endothelial cells  
927 (CD31<sup>+</sup>SCA1<sup>+</sup>).
- 928
- 929 **Figure 5 RNA sequencing revealed the molecular profile of skin Ebf2<sup>+</sup> and Ebf2-PαS**  
930 **MPCs.**
- 931 (A) Venn diagram showing differentially expressed genes (DEG) among the skin Ebf2<sup>+</sup> MPCs,  
932 skin Ebf2-PαS MPCs and BM MSCs.
- 933 (B) Gene set enrichment analysis (GSEA) revealed the enrichment of genes associated with  
934 different biological processes and cellular responses in the skin Ebf2<sup>+</sup> and Ebf2-PαS MPC  
935 subsets.

936 (C) A volcano plot showing differentially expressed genes between skin MPCs (Ebf2<sup>+</sup> and  
937 Ebf2-PαS) and BM MSCs.

938 (D) GSEA revealed the enrichment of gene sets associated with various biological processes  
939 and cellular responses in the skin MPCs (Ebf2<sup>+</sup> and Ebf2-PαS) and BM MSCs.

940 (E) GSEA plots showing the enrichment of genes related to oxidative phosphorylation,  
941 inflammatory and interferon alpha response in the skin MPCs compared to that in BM MSCs.  
942 FDR (false discovery rate) and *P* values are indicated in the panels.

943 (F) Heatmap showing the expressions of selected inflammatory cytokines in skin Ebf2<sup>+</sup> cells,  
944 Ebf2-PαS cells and BM MSCs. The heatmap was created in Excel using conditional formatting.  
945 The color scale was set based on the minimum, midpoint and maximum values of each gene in  
946 each row. Red correlates with high expression and green correlates with low expression.

947 (G) Gene sets enrichment plot showing hematopoiesis supportive niche genes in skin MPC  
948 subsets and BM MSCs, and the heatmap showing the gene expression levels.

949 (H) Q-PCR of HSC niche genes in BM MSCs, skin Ebf2<sup>+</sup> and Ebf2-PαS MPCs. Each dot  
950 represents mean of triplicate measurement of the gene expression relative to *Hprt*. Horizontal  
951 bars represent the mean values. Data were from 3 independent sorting experiments. Unpaired  
952 *t*-tests were used as statistical analysis.

953 See also in Figure S4.

954

955 **Figure 6 Mitochondrial transfer and Lama4 deficiency in skin MPCs contributed to the**  
956 **chemoprotection of AML cells from Ara-C.**

957 (A) Experimental strategy for determining mitochondrial transfer from stromal cells to AML  
958 cells *in vitro*. Skin MPCs and BM MSCs that were prelabelled with MitoTracker red were co-  
959 cultured with MLL-AF9<sup>+</sup> AML cells for 24 hours. Ara-C was added 4-6 hours after seeding  
960 the AML cells.

961 (B) Mean fluorescence intensity (MFI) of MitoTracker showing mitochondrial transfer from  
962 the stromal cells to AML cells in the cocultures. The AML cells were co-cultured with BM  
963 MSCs and skin PαS MPCs pre-labeled with MitoTracker red. The stromal cell-derived  
964 mitochondria were detected by MFI of MitoTracker in the AML cells at 24h post-coculture by  
965 FACS. Data shown are normalized MitoTracker MFI in the AML cells based on the values of  
966 that in the AML co-cultured with BM MSCs without Ara-C treatment. Each dot represents  
967 mean values of 3-4 replicated measurements in each experiment of 4. Horizontal bars are  
968 median values.

969 (C) Representative FACS histograms showing MitoTracker MFI in the AML cells 24h post  
970 coculture with the stromal cells. The MFI from AML cells in the monoculture without the  
971 prelabeled MPCs was used as a negative control.

972 (D) ROS levels in the AML cells cocultured with BM MSCs or skin PaS MPCs 24h post-Ara-  
973 C treatment. Each dot represents the average value of triplicate assays from each experiment  
974 of 3. Horizontal bars are mean values.

975 (E) The % of PI<sup>-</sup> live AML cells in the cocultures 24h after Ara-C treatment. Each dot  
976 represents mean values of 3-4 replicated measurements in each experiment of 4. Horizontal  
977 bars are median values.

978 The statistical differences in (B-E) among different types of cultures were determined by  
979 unpaired *t* test, and between NS and Ara-C treated groups within the same type of co-cultures  
980 were analyzed by paired *t* test.

981 (F) Experimental layout for assessing the impact of *Lama4* loss in skin MPCs for AML growth  
982 *in vitro* using a co-culture system. The *Lama4*<sup>+/+</sup> and *Lama4*<sup>-/-</sup> skin MPCs were co-cultured  
983 with MLL-AF9 AML cells in a 96-well plate. For CAFC assay, Ara-C was added 2 days post-  
984 seeding of AML cells. The numbers of total AML cells and CAFCs were counted at 24-28h  
985 and day 7 post-seeding AML cells, respectively.

986 (G) Fold changes in the number of the AML cells in the co-cultures with *Lama4*<sup>-/-</sup> skin MPCs  
987 in relation to that with *Lama4*<sup>+/+</sup> MPCs 24hours after Ara-C or saline treatment. Data were  
988 from 4 independent experiments and each dot represents the mean of triplicate assays. The  
989 horizontal bars represent mean values. Paired *t*-test was used for statistical analysis.

990 (H) The number of CAFCs derived from AML cells in the co-cultures with *Lama4*<sup>+/+</sup> and  
991 *Lama4*<sup>-/-</sup> skin MPCs treated with NS or Ara-C. Data shown are triplicate values from 2-3  
992 independent experiments. The horizontal bars represent mean values. Unpaired *t*-test was used  
993 for statistical analysis.

994

995 **Figure 7 A high level of residual AML cell infiltration in skin tissue of AML-promoting**  
996 ***Lama4*<sup>-/-</sup> mouse model post Ara-C treatment.**

997 (A) Experimental setup. *Lama4*<sup>+/+</sup> and *Lama4*<sup>-/-</sup> mice were treated with normal saline (NS) or  
998 Ara-C at day 15 after injection of DsRed-expressing MLL-AF9<sup>+</sup> AML cells. Peripheral blood  
999 (PB) and BM were collected for FACS and confocal microscopy at 1-day after NS or Ara-C  
1000 treatment.

1001 (B) Representative confocal images showing residual AML cells in dorsal skin at 1-day post-  
1002 Ara-C treatment.

1003 (C) Frequency of AML cells in PB and skin at 1-day post-Ara-C treatment.

1004 (D) Proportion of CD36<sup>+</sup> and KIT<sup>+</sup> AML LSCs in skin at 1-day post-Ara-C treatment.

1005 Data were from 2-5 experiments and each dot in C-D represents data from a single mouse. The

1006 horizontal bars represent the mean values. Unpaired *t*-test was used for statistical analysis.

1007 See also in Figure S6.

1008

**Figure 1**

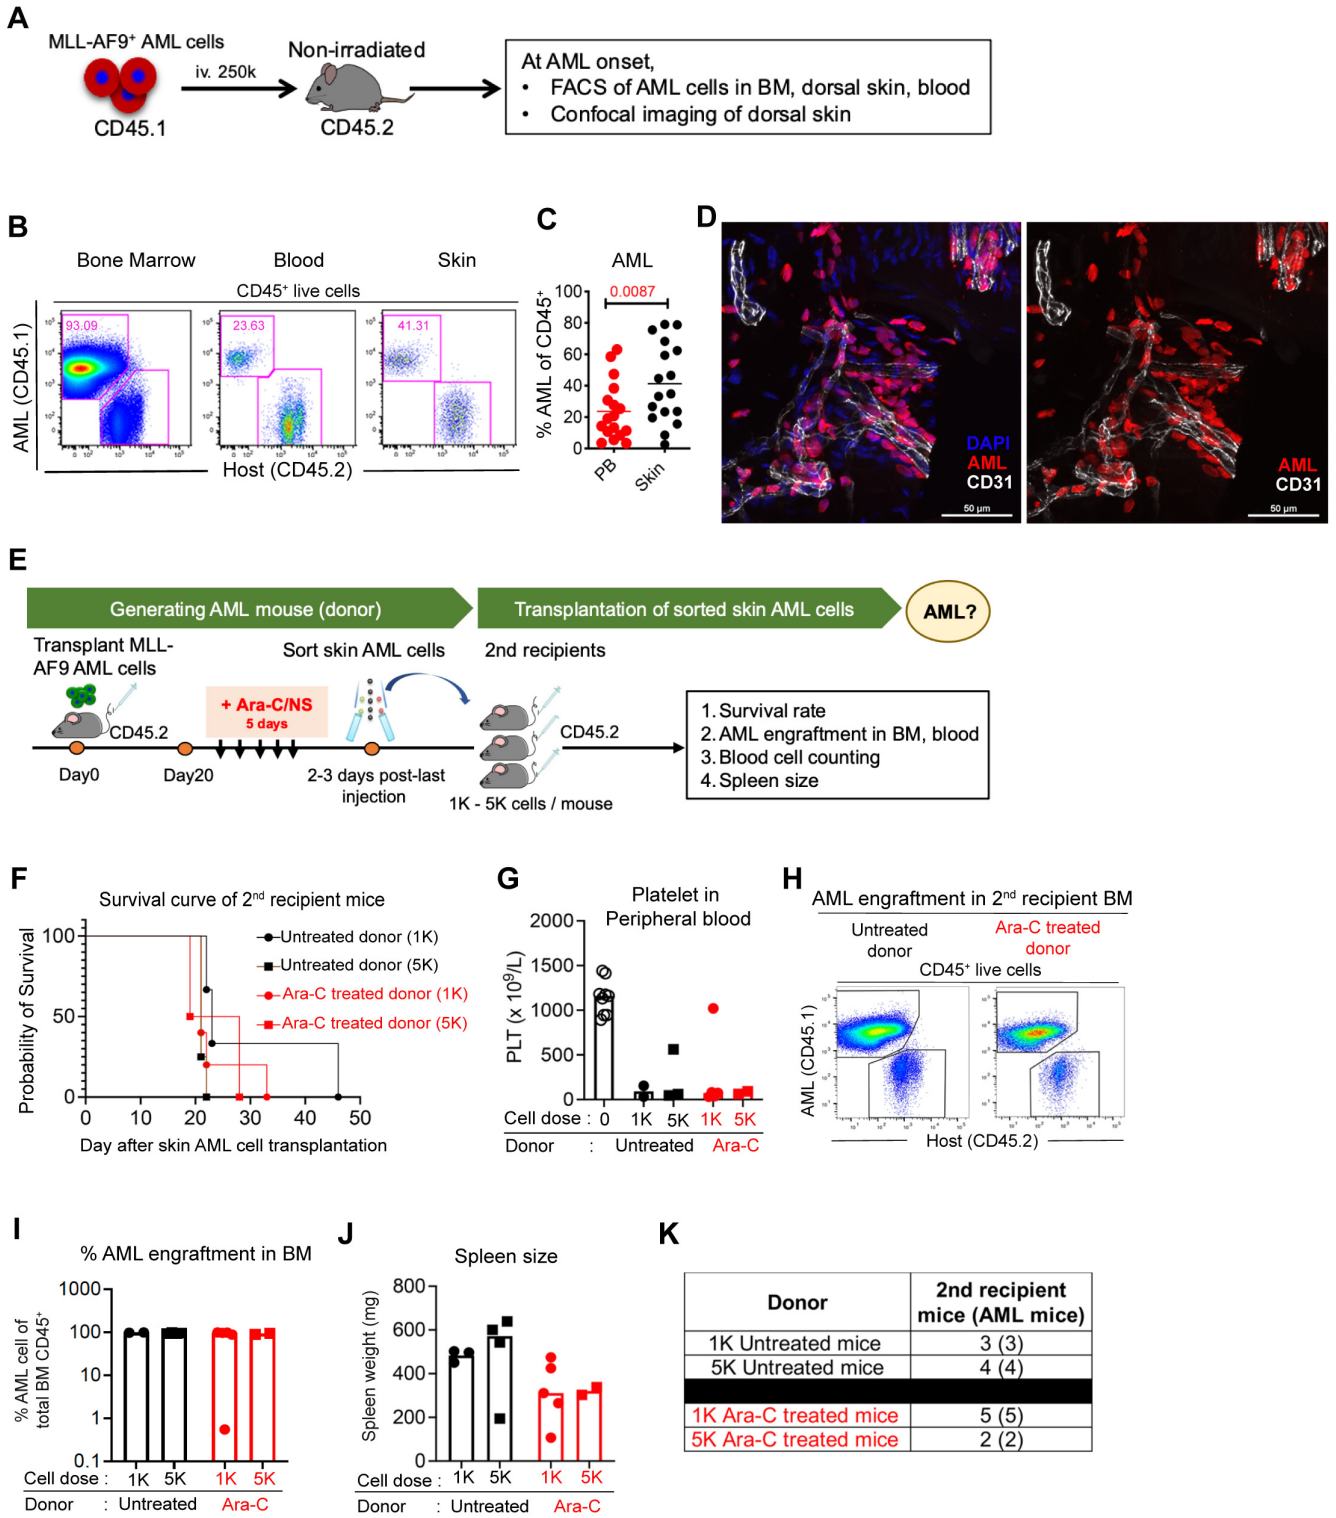

**Figure 2**

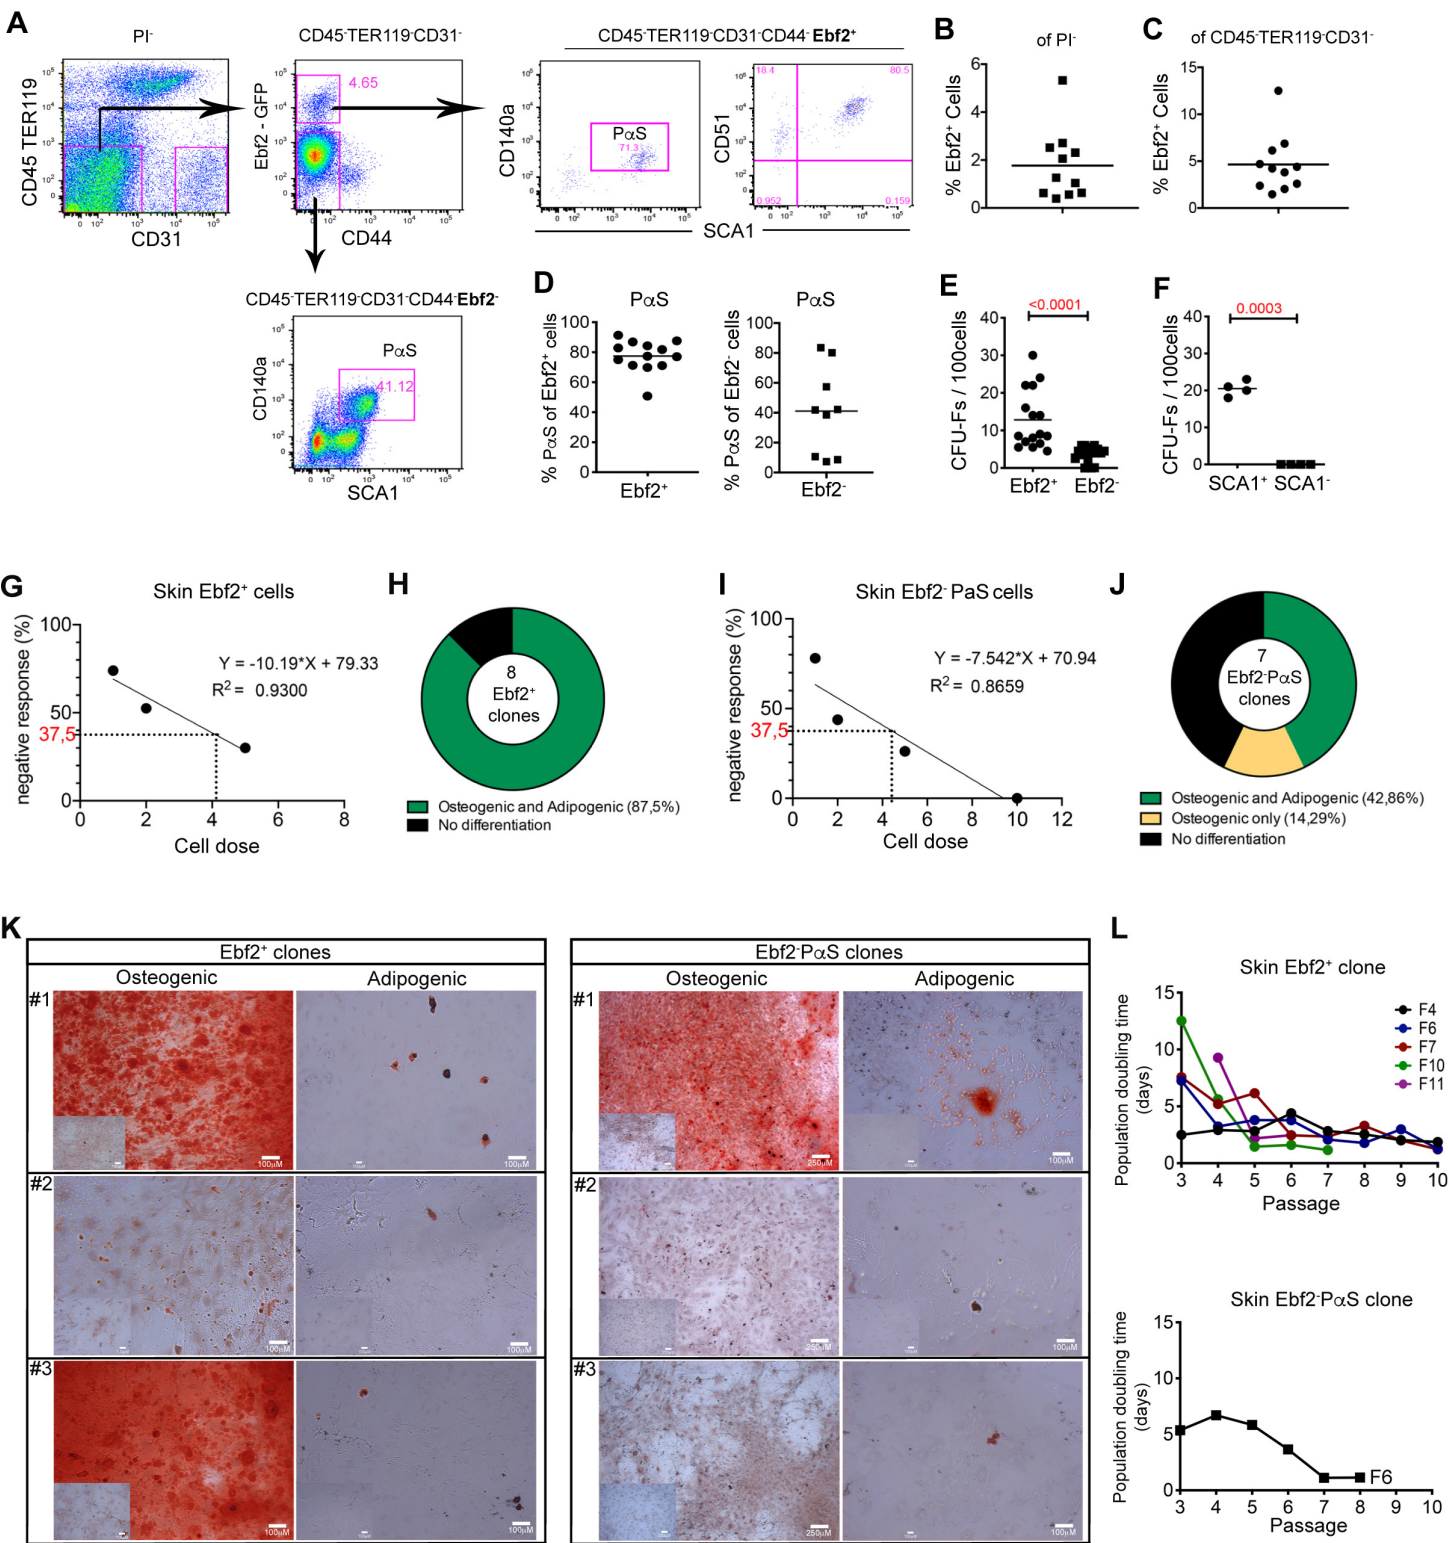



**Figure 3**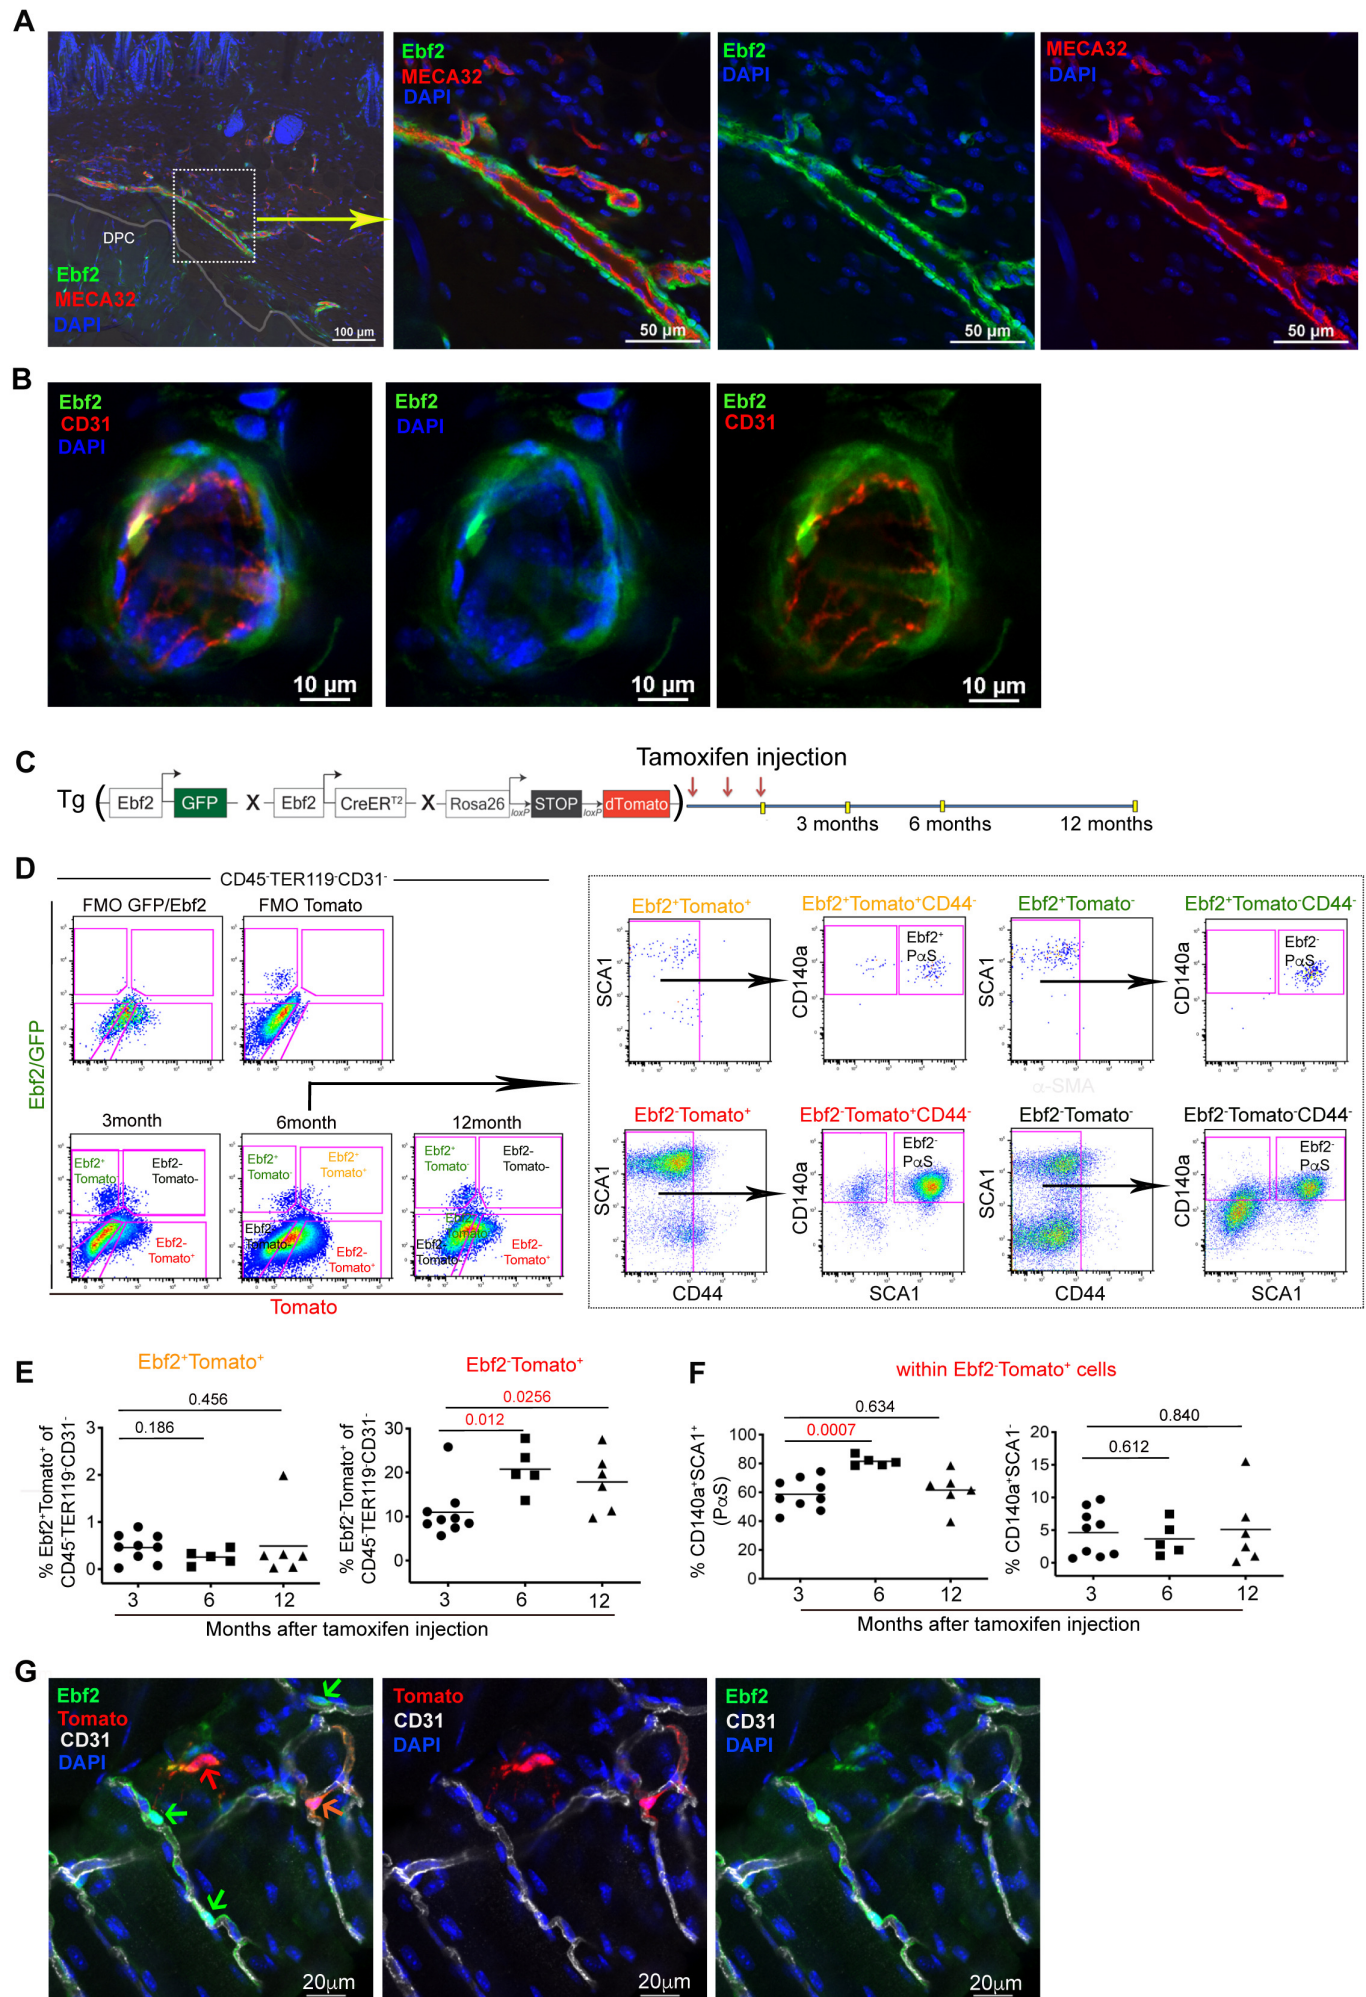

**Figure 4**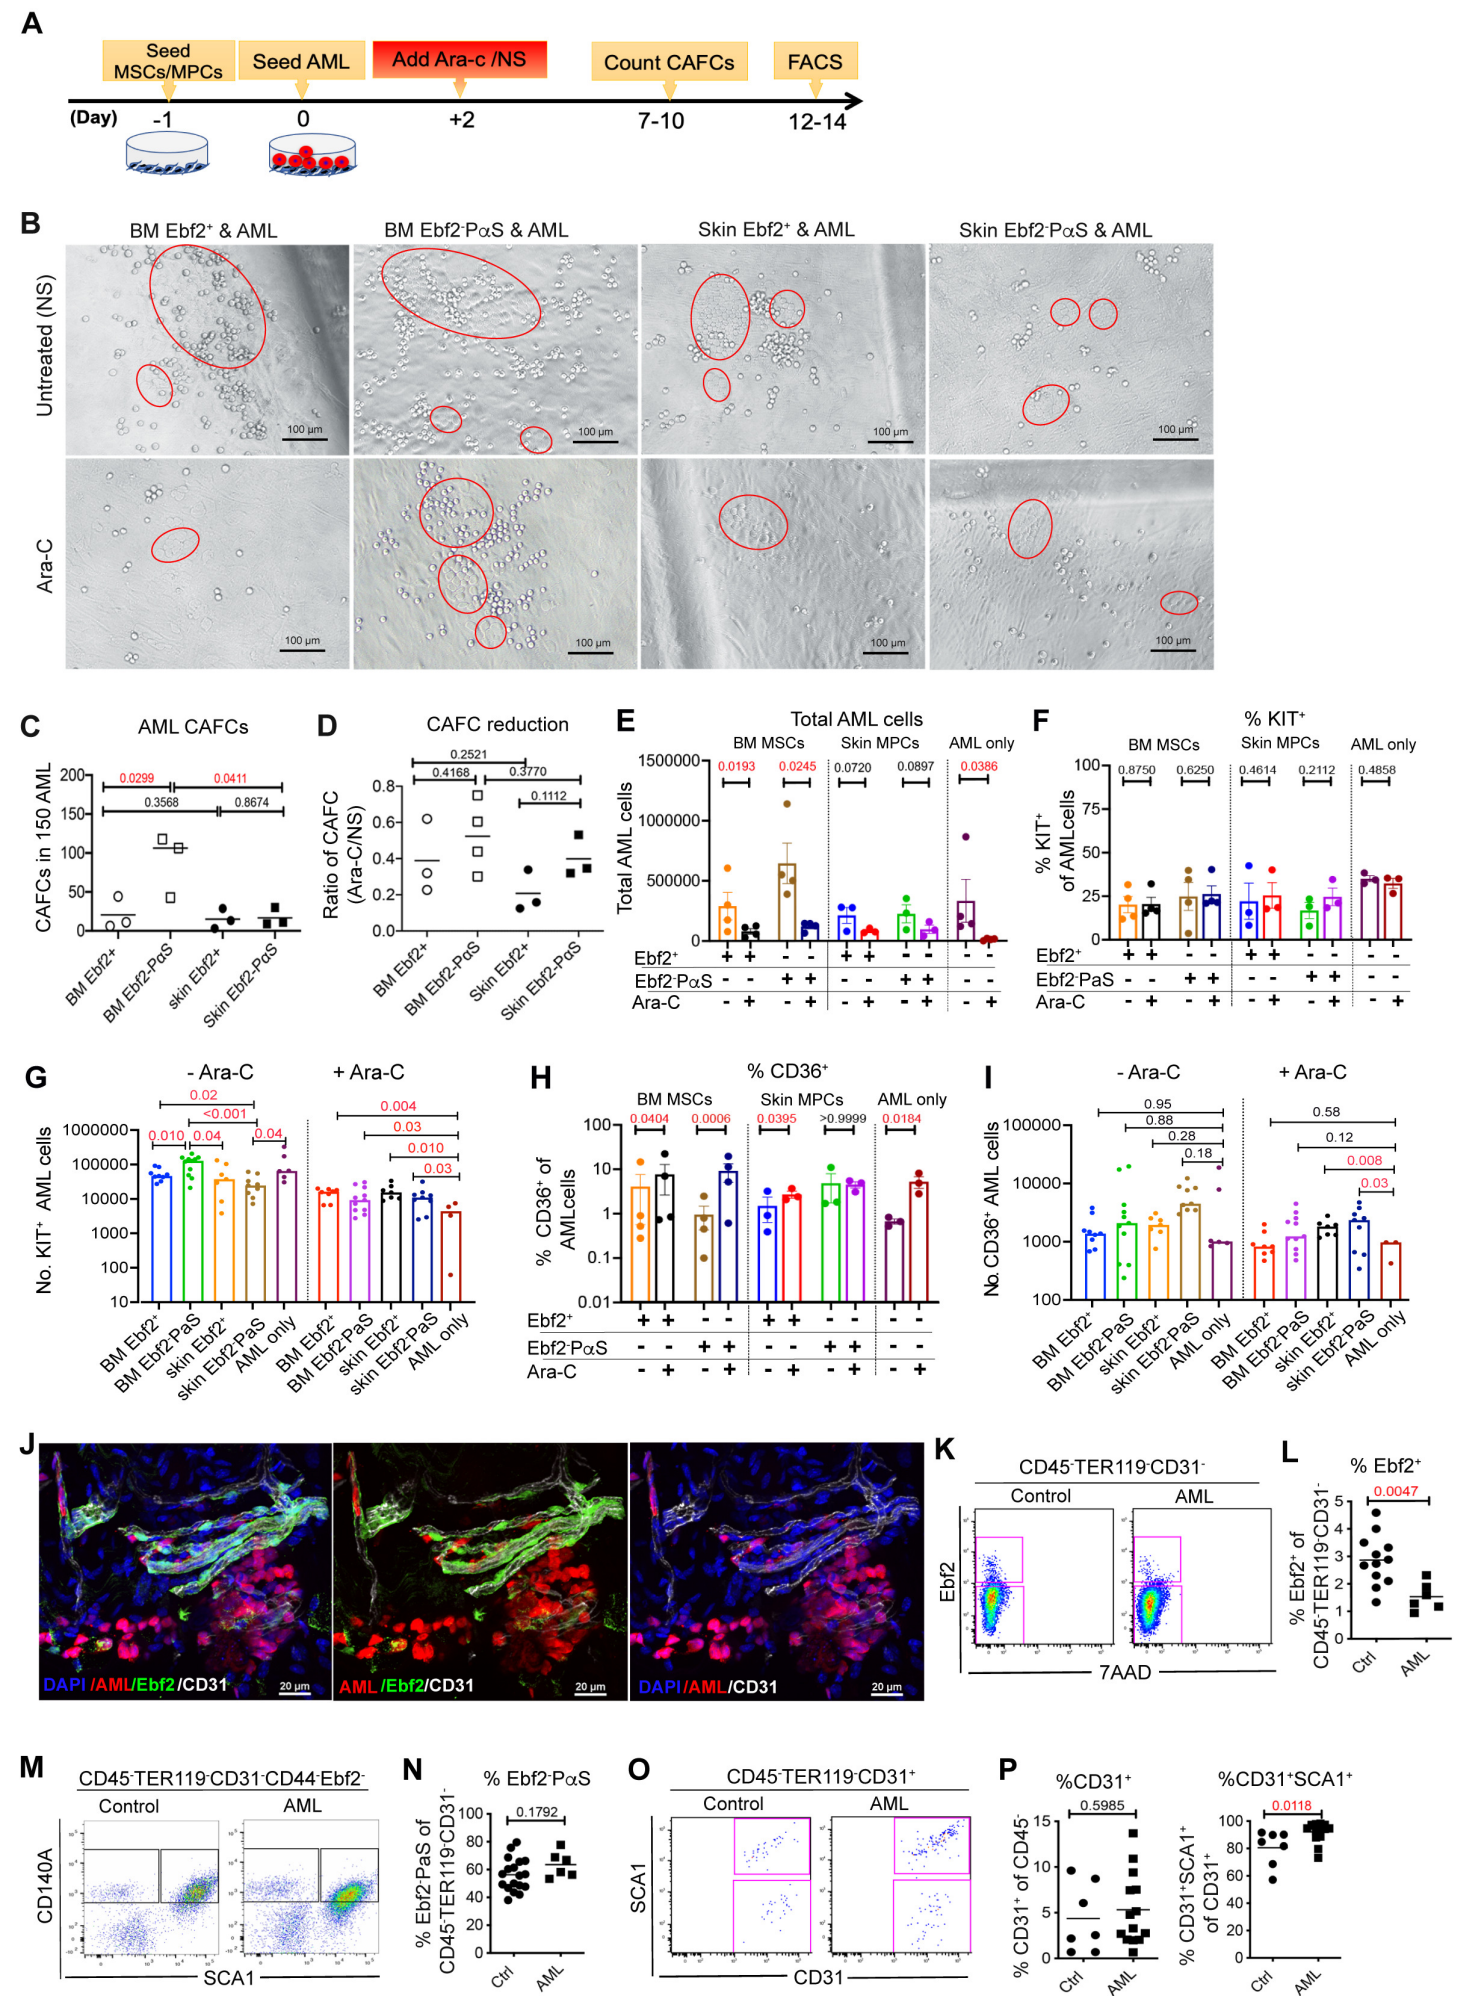

**Figure 5**

**A**

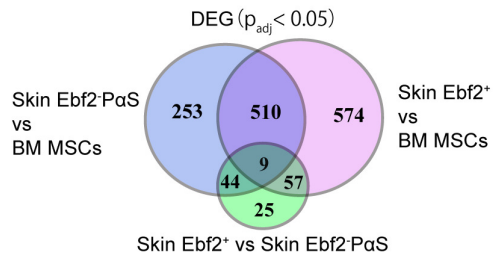

**B**

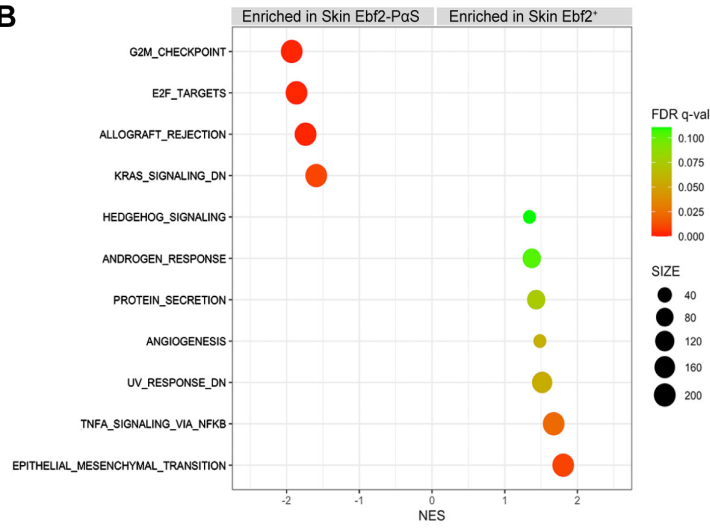

**C**

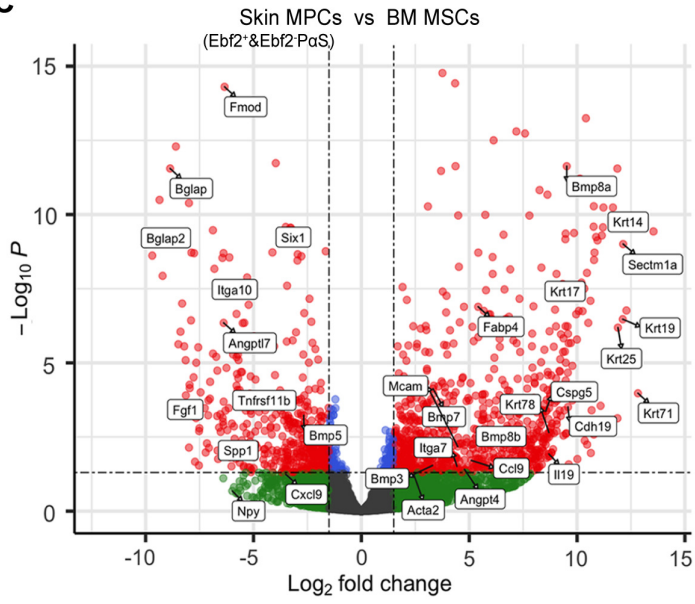

**D**

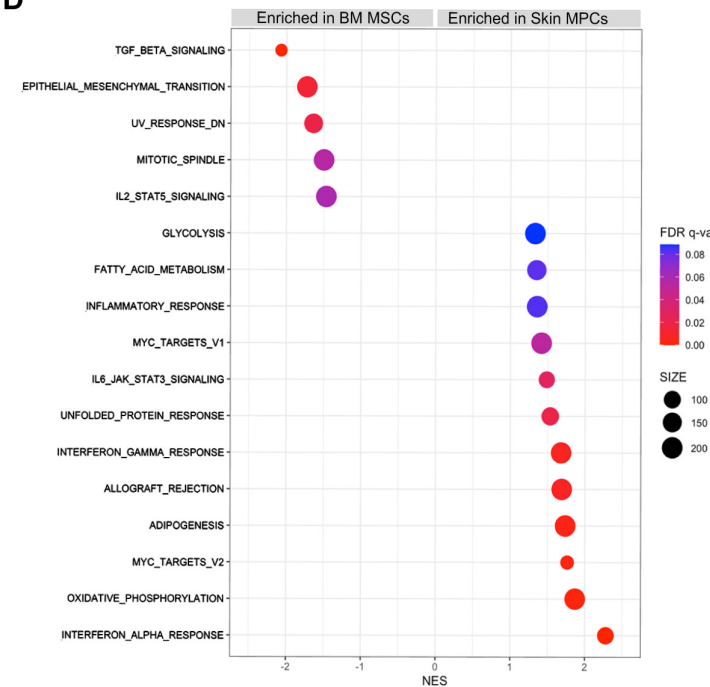

**E**

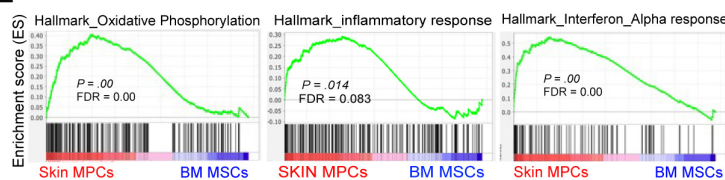

**F**

| Gene name     | Skin Ebf2 <sup>+</sup> ,S1 | Skin Ebf2 <sup>+</sup> ,S2 | Skin Ebf2 <sup>+</sup> ,S3 | Skin Ebf2 <sup>+</sup> -PaS,S1 | Skin Ebf2 <sup>+</sup> -PaS,S2 | Skin Ebf2 <sup>+</sup> -PaS,S3 | BM, MSC,S1 | BM, MSC,S2 | BM, MSC,S3 | BM, MSC,S4 |
|---------------|----------------------------|----------------------------|----------------------------|--------------------------------|--------------------------------|--------------------------------|------------|------------|------------|------------|
| <i>Il18</i>   | 122                        | 32                         | 171                        | 169                            | 157                            | 73                             | 97         | 13         | 13         | 77         |
| <i>Il18bp</i> | 228                        | 152                        | 111                        | 87                             | 102                            | 162                            | 29         | 70         | 5          | 41         |
| <i>Il15</i>   | 631                        | 24                         | 118                        | 131                            | 88                             | 63                             | 28         | 49         | 86         | 39         |
| <i>Il1rap</i> | 335                        | 262                        | 356                        | 366                            | 278                            | 958                            | 143        | 106        | 120        | 117        |
| <i>Il207</i>  | 3371                       | 5067                       | 2232                       | 2593                           | 5802                           | 2474                           | 2967       | 1555       | 2286       | 2973       |
| <i>Il204</i>  | 3511                       | 4946                       | 2656                       | 2651                           | 5000                           | 3504                           | 1846       | 1329       | 1105       | 1682       |
| <i>Il211</i>  | 8152                       | 14574                      | 7054                       | 5492                           | 13482                          | 8507                           | 2960       | 1116       | 831        | 2819       |
| <i>Il203</i>  | 938                        | 564                        | 346                        | 590                            | 1370                           | 250                            | 944        | 658        | 396        | 881        |
| <i>Il202b</i> | 431                        | 826                        | 937                        | 500                            | 383                            | 1058                           | 1          | 0          | 0          | 1          |
| <i>Il205</i>  | 12848                      | 19913                      | 11590                      | 7875                           | 22081                          | 14396                          | 4897       | 941        | 974        | 4723       |
| <i>Il35</i>   | 243                        | 930                        | 825                        | 376                            | 166                            | 814                            | 129        | 262        | 188        | 139        |
| <i>Cxcl10</i> | 1472                       | 340                        | 149                        | 229                            | 141                            | 66                             | 118        | 26         | 92         | 96         |
| <i>Cxcl13</i> | 2335                       | 752                        | 1429                       | 769                            | 434                            | 952                            | 34         | 63         | 333        | 40         |
| <i>Cxcl12</i> | 7035                       | 11057                      | 19005                      | 4945                           | 3118                           | 15236                          | 22583      | 24735      | 3674       | 22358      |
| <i>Ccl2</i>   | 3904                       | 5248                       | 1087                       | 2904                           | 1109                           | 608                            | 220        | 437        | 389        | 219        |
| <i>Ccl7</i>   | 4835                       | 3079                       | 1219                       | 3103                           | 1242                           | 1633                           | 2582       | 778        | 408        | 2503       |
| <i>Ccl11</i>  | 14379                      | 16222                      | 9447                       | 7467                           | 8214                           | 7383                           | 4395       | 2114       | 771        | 4364       |
| <i>Ccl8</i>   | 214                        | 90                         | 235                        | 843                            | 166                            | 1055                           | 64         | 45         | 5          | 51         |
| <i>Ccl9</i>   | 5                          | 479                        | 223                        | 0                              | 17                             | 5                              | 5          | 8          | 0          | 0          |
| <i>Il6</i>    | 3325                       | 4636                       | 1552                       | 465                            | 641                            | 774                            | 377        | 343        | 541        | 373        |
| <i>Il4ra</i>  | 3661                       | 3552                       | 6295                       | 2761                           | 5819                           | 6825                           | 836        | 882        | 213        | 933        |
| <i>Traf5</i>  | 288                        | 17                         | 175                        | 187                            | 81                             | 265                            | 16         | 36         | 30         | 17         |

**G**

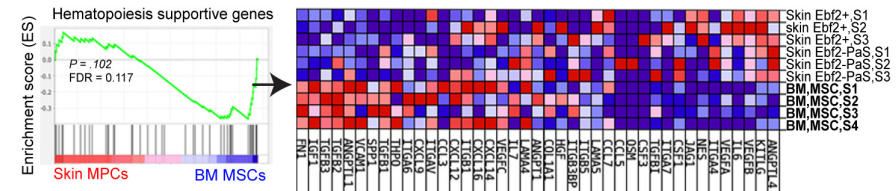

**H**

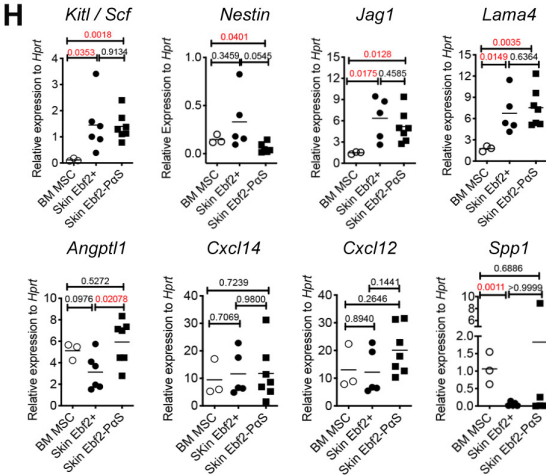

**Figure 6**

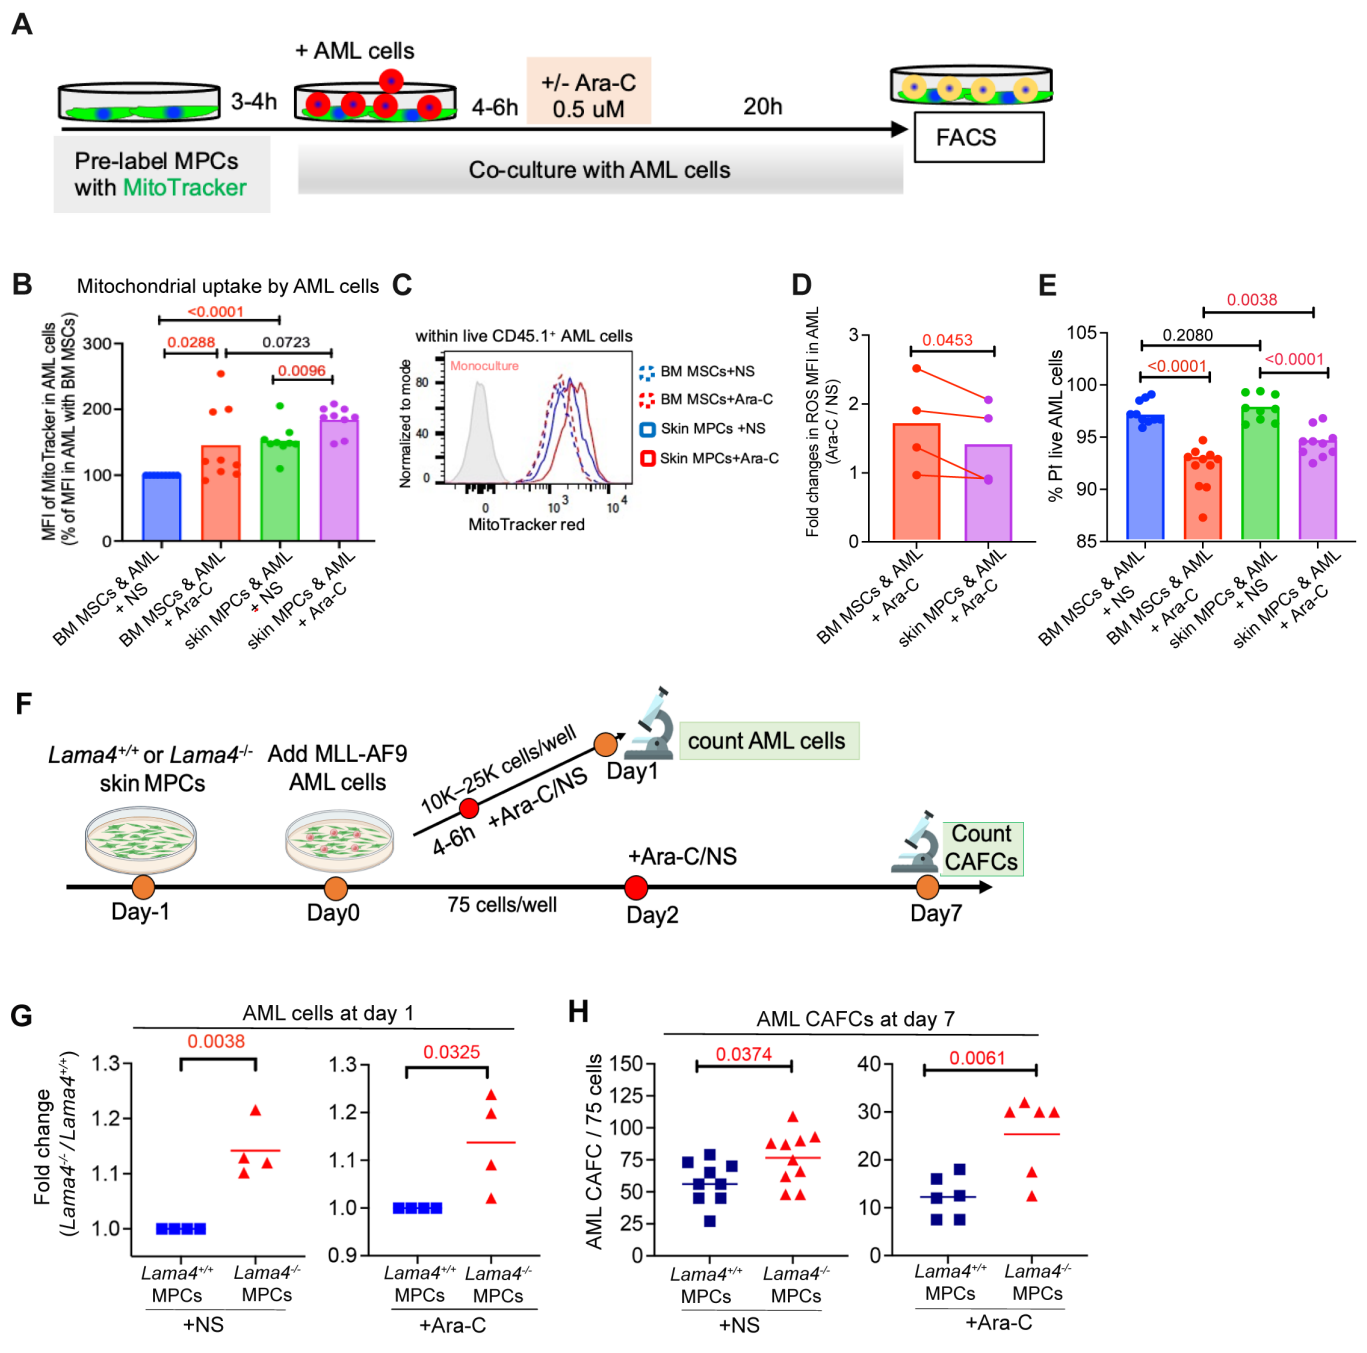

**Figure 7**

**A**

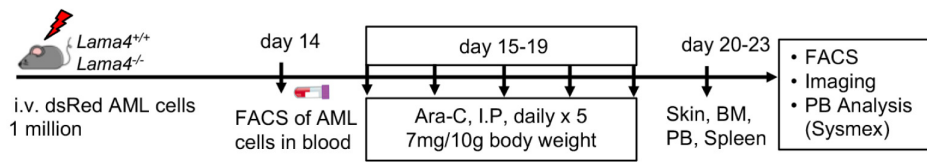

**B**

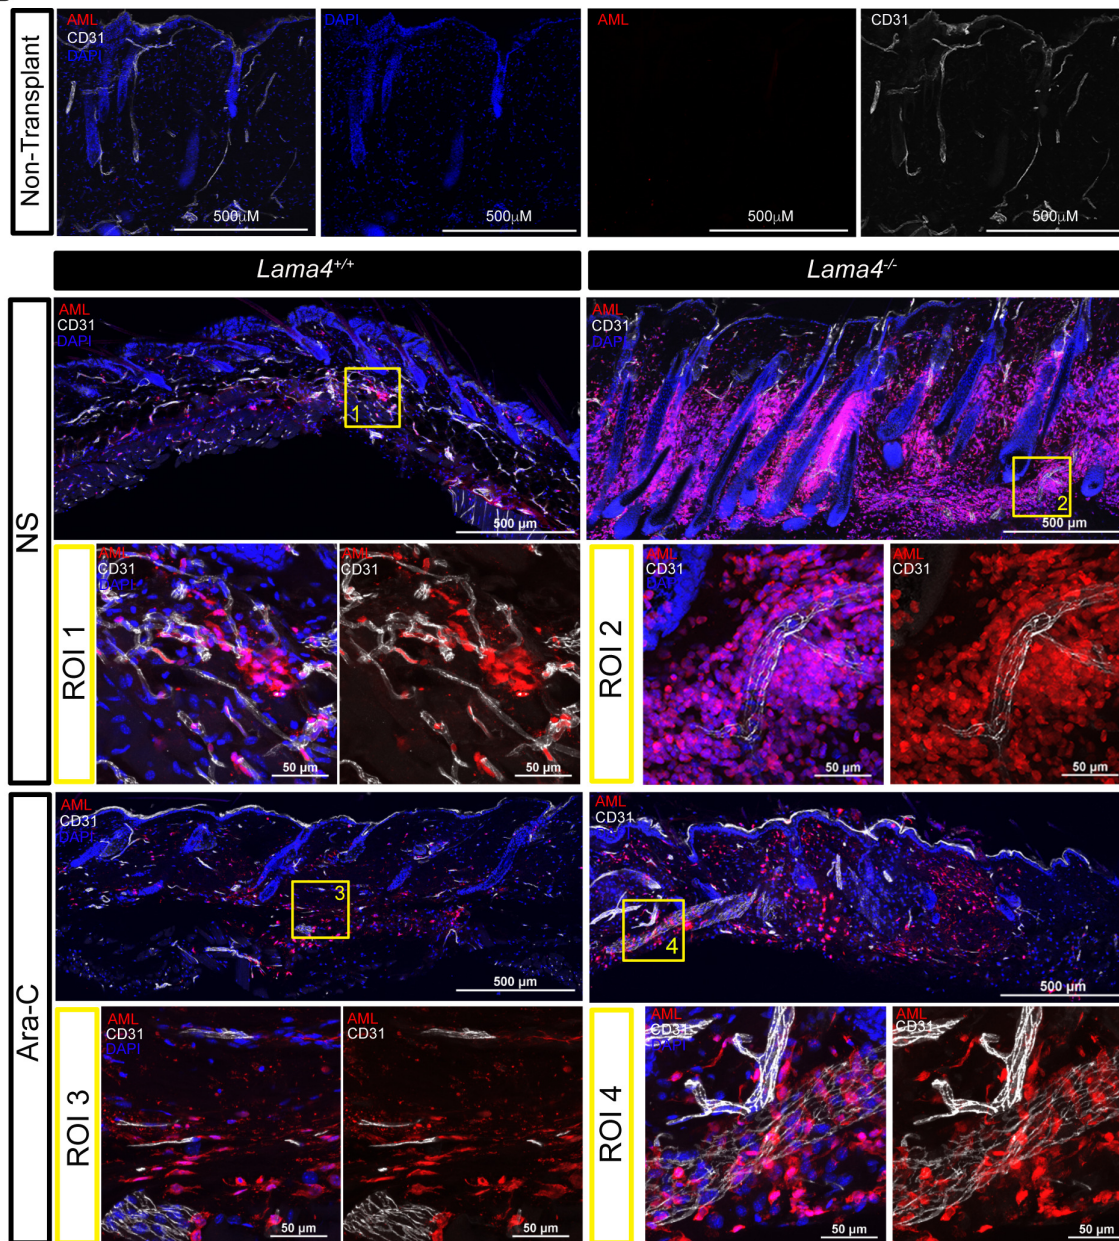

**C**

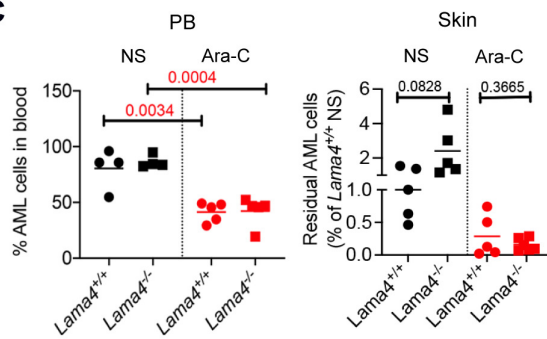

**D**

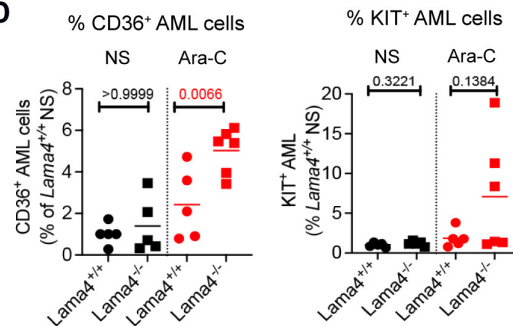

Source: https://www.biorxiv.org/content/10.1101/2022.05.20.491183v1.full.pdf
